# Supplementary material for: Gut microbiome-immune interactions and their role in rheumatoid arthritis development
Source: PeerJ journal article supplement (doi:10.7717/peerj.17477), 2024-07-11

|                                                   |      |      |      |
|---------------------------------------------------|------|------|------|
| f_Sphingomonadaceae g_Sphingomonas                | **   | **   | **   |
| f_Rhizobiaceae g_Phyllobacterium                  | **   | **   | **   |
| f_Staphylococcaceae g_Staphylococcus              | **   | **   | **   |
| f_Coriobacteriaceae g_Collinsella                 | *    | *    | *    |
| f_Oscillospiraceae g_NK4A214_group                | *    | *    | *    |
| f_Lactobacillaceae g_Ligilactobacillus            | *    | *    | *    |
| f_Veillonellaceae g_Dialister                     | ***  | ***  | ***  |
| f_Lachnospiraceae g_Dorea                         | **** | ***  | ***  |
| f_Ruminococcaceae g_Ruminococcus                  | **   | **   | **   |
| f_Clostridiaceae g_Clostridium_sensu_stricto_1    | **   | **   | **   |
| f_Lachnospiraceae g_Sellimonas                    | **** | **** | **** |
| f_Lachnospiraceae g_Lachnospiraceae_NK4A136_group | *    | *    | *    |
| f_Ruminococcaceae g_[Eubacterium]_siraeum_group   | *    | *    | *    |
| f_Bacteroidaceae g_Bacteroides                    | **   | **   | **   |
| f_Desulfovibrionaceae g_Desulfovibrio             | *    | **   | *    |
| f_Lachnospiraceae g_Tyzzarella                    | **   | **   | **   |

**p ≤ 0.05**

RF      ACPA      RF/ACPA

**A**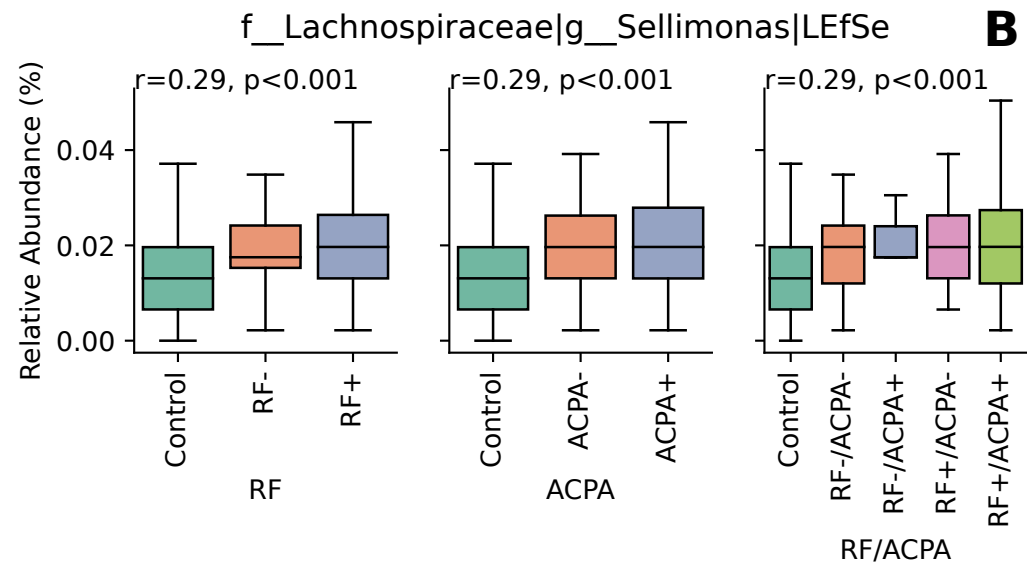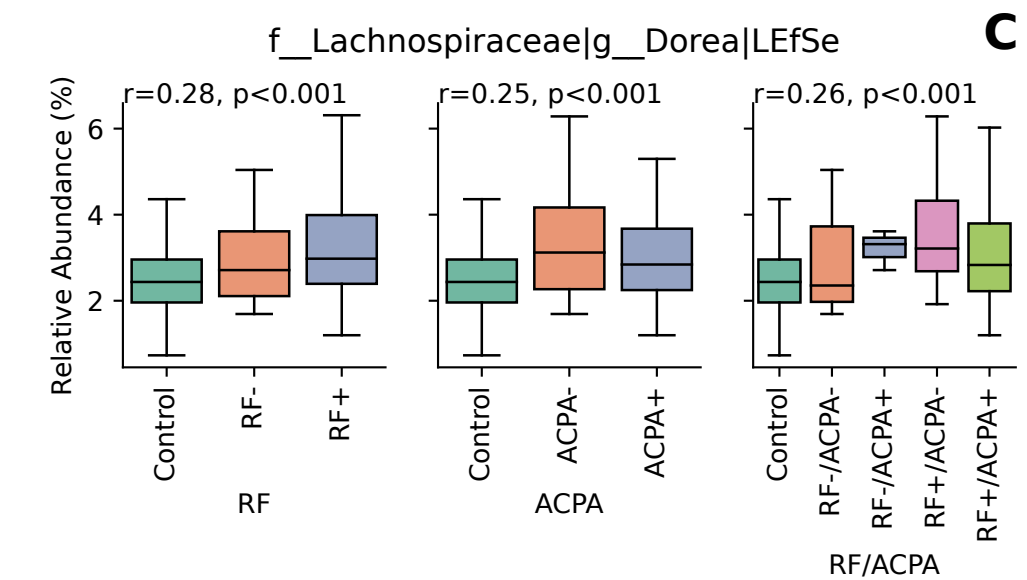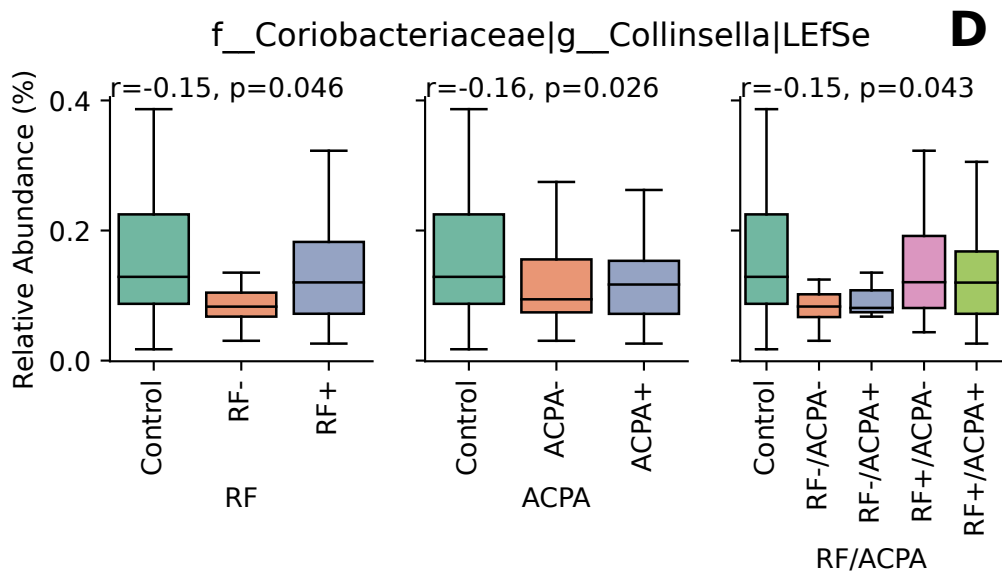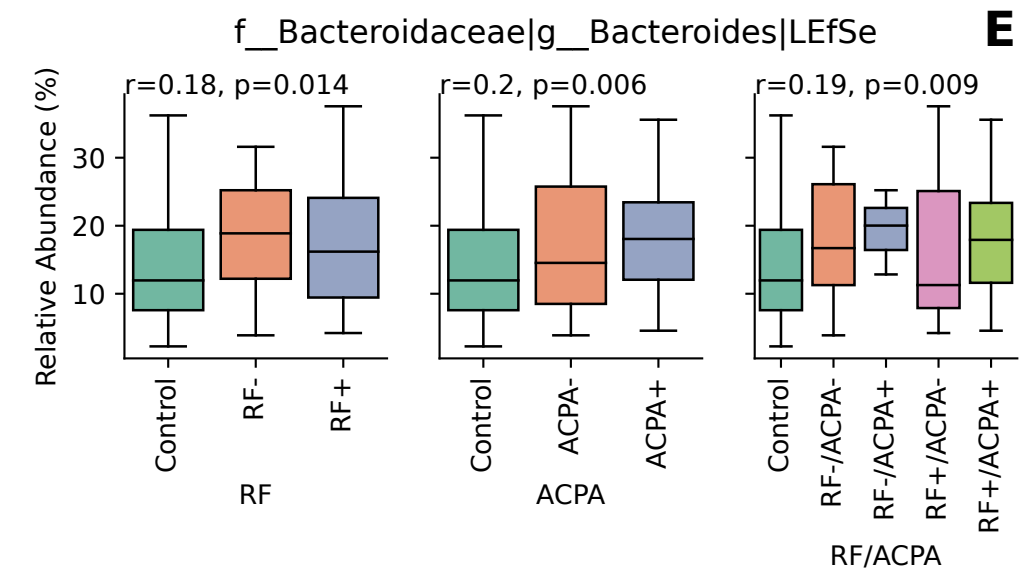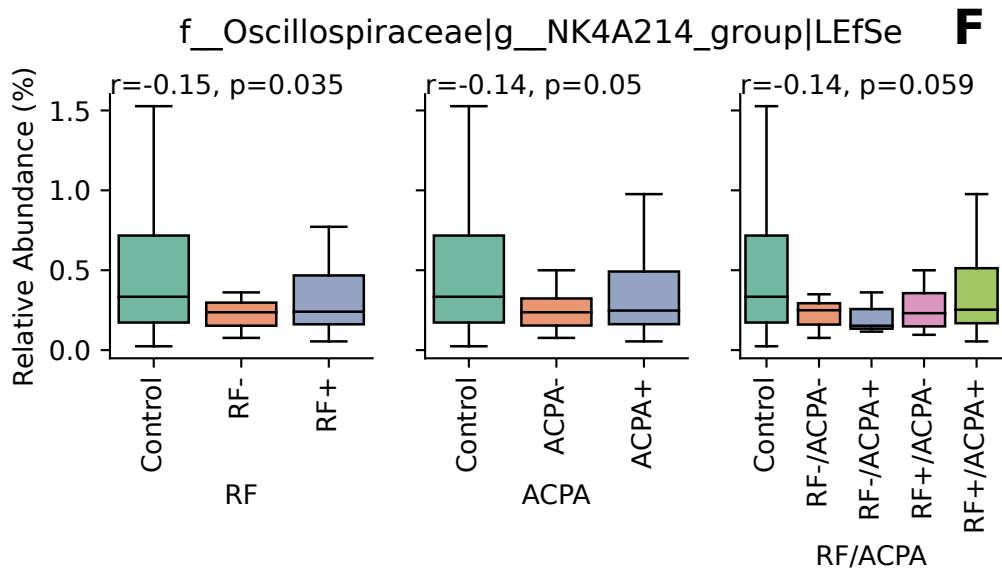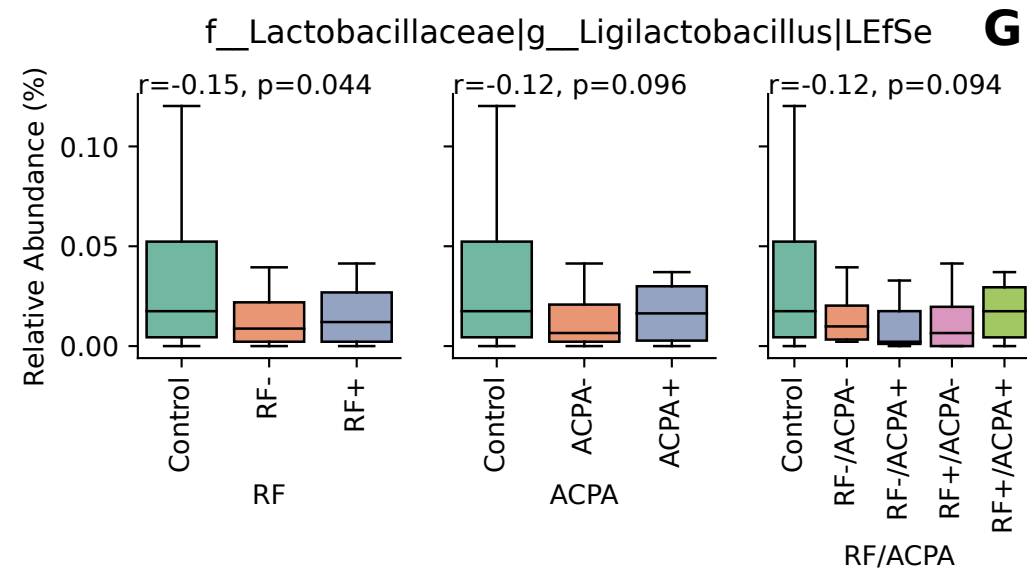

Supplement: FigureS3.pdf [file FigureS3.pdf]
