# Supplementary material for: Gut microbiome-immune interactions and their role in rheumatoid arthritis development
Source: PeerJ journal article supplement (doi:10.7717/peerj.17477), 2024-07-11
Supplement: FigureS6.pdf [file FigureS6.pdf]

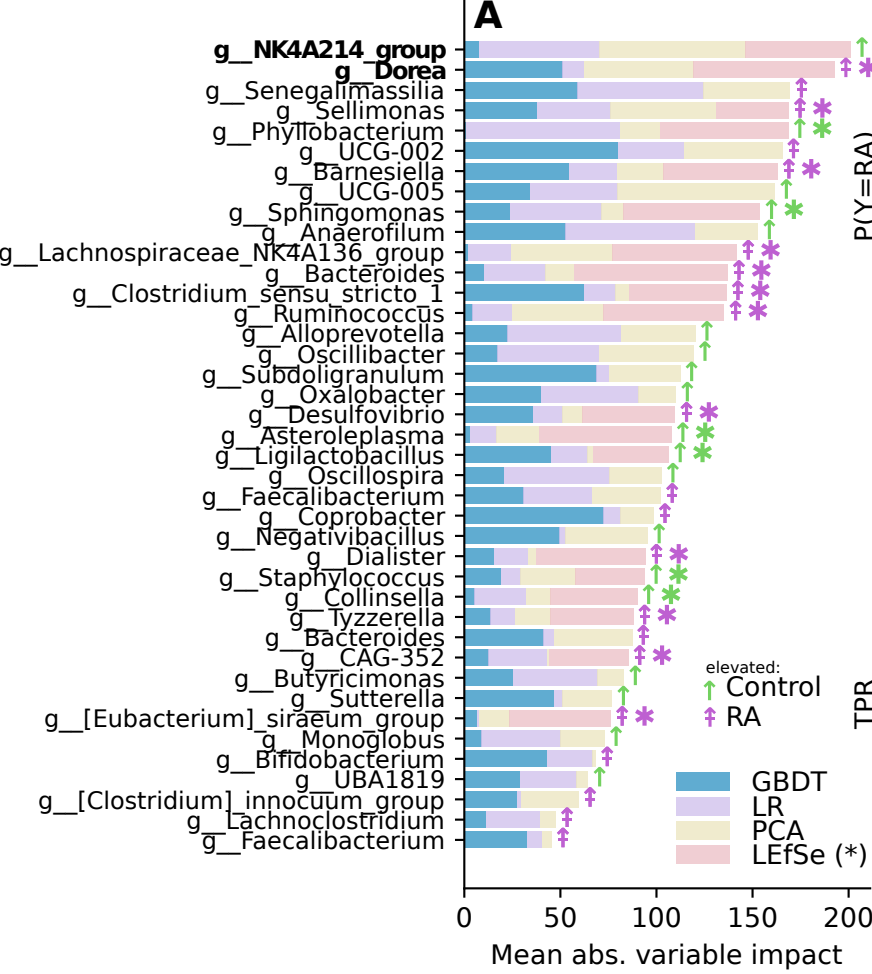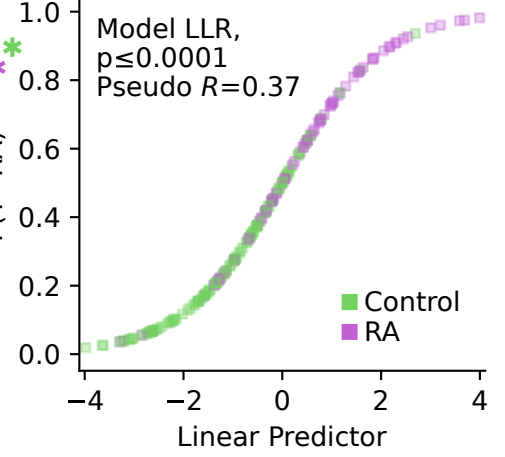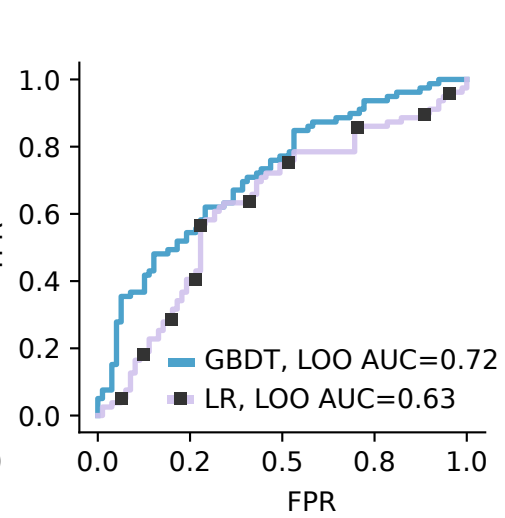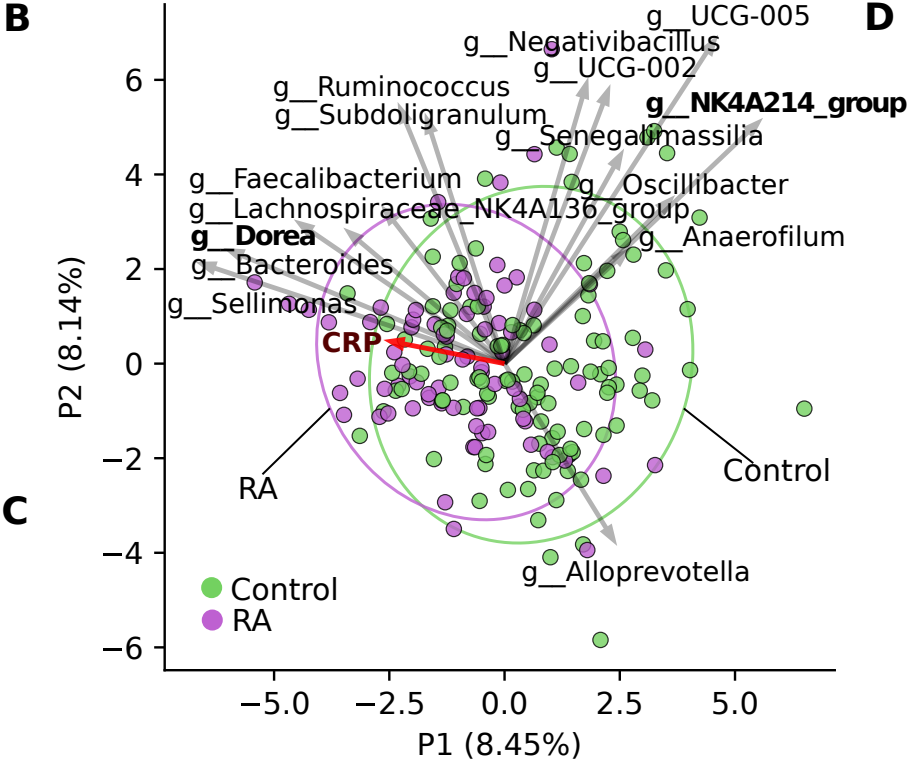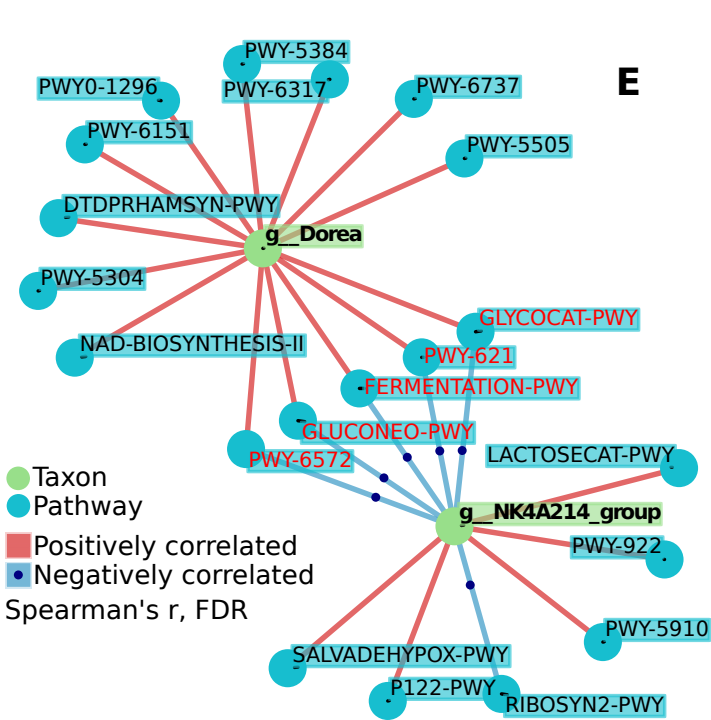

- PWY-5505: L-glutamate and L-glutamine biosynthesis
- PWY-621: sucrose degradation III (sucrose invertase)
- GLYCOCAT-PWY: glycogen degradation I (bacterial)
- PWY-6737: starch degradation V
- PWY-6317: galactose degradation I (Leloir pathway)
- PWY-5384: sucrose degradation IV (sucrose phosphorylase)
- PWY-1296: purine ribonucleosides degradation
- FERMENTATION-PWY: mixed acid fermentation
- PWY-6151: S-adenosyl-L-methionine cycle I
- DTDP RHAMSYN-PWY: dTDP-L-rhamnose biosynthesis I
- PWY-5304: superpathway of sulfur oxidation (Acidianus ambivalens)
- GLUCONEO-PWY: gluconeogenesis I
- PWY-6572: chondroitin sulfate degradation I (bacterial)
- NAD-BIOSYNTHESIS-II: NAD salvage pathway II
- GLYCOCAT-PWY: glycogen degradation I (bacterial)
- P122-PWY: heterolactic fermentation
- RIBOSYN2-PWY: flavin biosynthesis I (bacteria and plants)
- PWY-5910: superpathway of geranylgeranyldiphosphate biosynthesis I (via mevalonate)
- PWY-922: mevalonate pathway I
- LACTOSECAT-PWY: lactose and galactose degradation I
