# Supplementary material for: Gut microbiome-immune interactions and their role in rheumatoid arthritis development
Source: PeerJ journal article supplement (doi:10.7717/peerj.17477), 2024-07-11
Supplement: RAW_DATA_FIGURE_4.xlsx [file RAW_DATA_FIGURE_4.xlsx]

## Sheet: raw-data-fig4.tsv
ID	DAS28	RF	MIG	IP10	FLT3L	IL6	TNFa	VEGF_A	IL17E_IL25	IL1a	GROa	FGF2	IL5	TNFb
0	2.77	RF-	0.1	0.1	0.1	0.1	0.1	0.1	0.1	0.1	na	na	na	na
1	4.97	RF+	0.1	0.1	0.1	0.1	0.1	0.1	0.1	0.1	na	na	na	na
2	2.24	RF+	5236.24	1855.08	69.28	57.01	477.04	1457.1	3662.41	30.87	75.03	1764.93	14.1	111.82
3	7.38	RF+	6662.08	1326.4	97.09	353.53	796.55	3797.44	5069.02	55.06	106.09	2224.85	38.47	154.92
4	6.72	RF+	10174.6	2324.14	60.23	85.56	421.05	992.79	5454.2	39.29	106.09	1922.64	29.79	70.1
5	6.27	RF+	17082.5	2697.97	173.81	118.59	1615.73	2430.61	10150.5	168.91	242.96	4628.38	46.82	1062
6	4.59	RF+	10886.1	1575.95	55.59	62.93	342.59	513	3288.88	17.2	75.03	1489.74	44.07	70.1
7	3.72	RF+	5495.76	877.87	90.85	59.98	362.68	1020.13	5069.02	165.77	106.09	2125.88	29.79	100.29
8	4.96	RF-	6857.32	906.65	74.8	84.18	342.59	2124.14	5069.02	68.2	93.27	1656.88	23.75	62.76
9	4.39	RF+	0.1	0.1	0.1	0.1	0.1	0.1	0.1	0.1	na	na	na	na
10	3.16	RF-	4968	757.73	132.86	17.27	401.88	372.29	4869.5	33.66	40.64	1374.42	41.29	70.1
11	4.26	RF+	0.1	0.1	0.1	0.1	0.1	0.1	0.1	0.1	na	na	na	na
12	3.77	RF+	8209.23	947.03	84.52	152.16	513.26	694.26	8093.6	102.56	213.44	2989.88	26.8	382.94
13	5.09	RF-	12169.7	4866.44	64.79	26.48	548.73	774.54	4013.65	28.9	108.17	1432.51	17.42	62.76
14	6.15	RF-	16803.8	2483.51	124.14	180.72	684.34	5451.67	7411.66	65.26	215.03	2418.17	26.8	175.11
15	5.43	RF+	13728.4	2037.33	83.45	282.9	439.95	524.16	3781.73	33.66	101.89	1711.22	35.62	100.29
16	4.23	RF+	0.8	0.8	0.8	0.8	0.8	0.8	0.8	0.8	na	na	na	na
17	4.05	RF-	6884.91	1044.55	43.56	35.03	362.68	2346.3	3024.57	26.71	84.34	1432.51	10.63	15.29
18	6.37	RF+	29870.4	5224.05	228.12	180.72	2257.91	2712.45	12660.1	159.52	159.7	4400.45	42.68	2026.86
19	3.85	RF+	6690.19	792.94	138.59	47.86	1080.18	774.54	6521.16	52.16	130.1	2125.88	23.7	559.78
20	1.61	RF+	0.1	0.1	0.1	0.1	0.1	0.1	0.1	0.1	na	na	na	na
21	4.75	RF-	4020.07	471.04	50.86	35.03	342.59	983.62	5359.52	36.47	54.85	1546.19	29.79	70.1
22	5.64	RF+	6662.08	1591.6	35.97	71.59	311.77	71.4	1766.6	44.98	88.85	1432.51	6.95	70.1
23	2.82	RF+	7961	670.66	61.38	200.37	301.28	955.96	5454.2	40.71	97.62	2224.85	2.86	88.34
24	5.54	RF+	38764.4	3670.94	259.97	349.46	651.26	2339.23	5913.22	69.67	197.26	1764.93	45.45	62.76
25	4.55	RF+	na	na	na	na	na	na	na	na	na	na	na	na
26	4.19	RF+	6463.02	1378.65	46.02	86.93	1108.66	268.71	3540.63	25.34	60.13	1374.42	38.47	70.1
27	4.51	RF-	4020.07	300.21	38.54	21.06	212.7	71.4	1766.6	6.81	34.41	1315.42	10.63	70.1
28	5.5	RF+	7049	1583.79	38.54	92.36	332.42	2806.69	5069.02	104.07	54.85	1403.57	14.1	70.1
29	2.87	RF+	5931.63	982.67	48.45	70.16	458.61	1205.83	6771.16	47.84	110.23	1711.22	20.62	70.1
30	3.08	RF+	7448.75	689.43	55.59	59.98	382.44	1020.13	4869.5	46.41	106.09	2025.19	32.73	154.92
31	6.6	RF+	16427.6	2850.21	71.5	47.86	477.04	71.4	3540.63	36.47	101.89	1489.74	29.79	70.1
32	6.61	RF-	13904.4	2058.2	248.34	31.67	858.54	2268.22	3540.63	44.98	84.34	1601.88	10.63	70.1
33	6.28	RF+	na	na	na	na	na	na	na	na	na	na	na	na
34	7.33	RF+	16788.2	1248.78	297.42	210.61	926.68	2569.24	11507.2	346.38	259.43	8861.94	90.41	382.94
35	7.2	RF+	7343.54	1473.99	88.75	154.58	780.83	734.74	18267.4	92	135.84	2811.61	54.91	413.9
36	3.11	RF-	7500.99	1184.99	34.67	31.67	311.77	408.81	2745.06	17.2	97.62	1285.55	19.03	70.1
37	6.22	RF+	11997.2	1509.4	124.14	171.31	858.54	794.21	10150.5	101.05	197.26	2766.41	46.82	318.58
38	3.36	RF+	6289.17	1600.96	48.45	50.95	322.14	1902.33	2446.63	25.34	97.62	1518.06	20.62	70.1
39	4.38	RF+	0	0	0	0	0	0	0	0	na	na	na	na
40	5.87	RF-	0.1	0.1	0.1	0.1	0.1	0.1	0.1	0.1	na	na	na	na
41	3.72	RF+	0.1	0.1	0.1	0.1	0.1	0.1	0.1	0.1	na	na	na	na
42	3.9	RF+	18081.5	4706.69	76.98	93.7	583.51	1991.94	5166.98	44.98	133.94	2025.19	38.47	88.34
43	2.39	RF+	6577.25	739.82	41.07	80.03	1261.57	1074.17	5454.2	47.84	156.12	1844.4	17.42	222.83
44	1.74	RF+	0.1	0.1	0.1	0.1	0.1	0.1	0.1	0.1	na	na	na	na
45	3.16	RF+	4174.97	617.65	53.24	24.71	290.69	673.75	2745.06	80.04	31.12	1315.42	6.95	62.76
46	8	RF+	7130.11	1635.05	85.58	44.73	566.2	71.4	6002.38	77.07	143.34	2075.76	20.62	301.89
47	3.29	RF+	0.1	0.1	0.1	0.1	0.1	0.1	0.1	0.1	na	na	na	na
48	6.28	RF+	7021.82	577.67	111.3	106.96	634.53	2423.61	8741.75	125.43	159.7	3729.69	38.47	154.92
49	5.29	RF+	16959	1822.94	423.65	631.57	1983.59	5786.57	27676.6	1002.45	683.76	15526.7	363.31	902.43
50	2.4	RF+	0.1	0.1	0.1	0.1	0.1	0.1	0.1	0.1	na	na	na	na
51	6.13	RF-	7263.98	737.56	75.9	38.33	458.61	1932.34	3781.73	39.29	118.33	1844.4	23.75	33.37
52	4.32	RF+	15015.9	1857.99	90.85	109.56	804.38	444.36	8313.11	104.07	135.84	2743.7	32.73	429.12
53	5.1	RF+	0.1	0.1	0.1	0.1	0.1	0.1	0.1	0.1	na	na	na	na
54	4.52	RF+	7910.75	873.72	98.12	93.7	1007.97	3207.15	7333.5	89	166.76	2075.76	65.38	375.08
55	3.93	RF-	11210.7	1431.62	62.52	9.03	301.28	890.45	1766.6	19.89	70.2	1255.43	6.95	70.1
56	7.15	RF+	12491.2	2147.56	72.61	233	617.67	4508.91	5454.2	39.29	101.89	2025.19	38.47	284.91
57	5.48	RF+	9915.73	1470.75	170.18	156.99	858.54	2196.53	11625.6	202.05	276.96	4070.05	57.56	502.98
58	6.82	RF+	12918.1	3381.76	86.64	47.86	548.73	1333.26	3540.63	18.54	57.51	1656.88	23.75	133.9
59	8.35	RF+	14831.5	1523.78	181.01	1196.01	1234.2	2873.44	17172.9	297.13	268.25	6928.02	450.02	784.94
60	1.9	RF+	7049	1145.19	98.12	84.18	495.25	1162.45	10021.7	77.07	101.89	2418.17	23.75	250
61	3.96	RF-	7784.21	1195.73	69.28	129.98	382.44	197.33	4454.34	25.34	60.13	1574.13	15.77	33.37
62	3.82	RF+	na	na	na	na	na	na	na	na	na	na	na	na
63	4.74	RF+	4618.66	617.65	53.24	80.03	382.44	71.4	5069.02	25.34	116.33	1711.22	20.62	70.1
64	4.05	RF+	6829.65	960.97	158.28	173.67	1851.29	1609.56	9361.5	165.77	182.26	4889.32	57.56	258.86
65	1.54	RF-	4363.44	382.55	53.24	31.67	362.68	71.4	2745.06	33.66	79.74	1489.74	17.42	62.76
66	4.56	RF+	3614.3	782.02	92.94	41.56	382.44	1432.6	4013.65	25.34	70.2	1601.88	17.42	33.37
67	3.39	RF-	5992.18	612.73	62.52	41.56	513.26	308.79	5263.79	33.66	99.76	1432.51	26.8	133.9
68	7.15	RF+	20387.9	12526.8	76.98	80.03	889.02	1265.78	5166.98	43.55	173.71	2150.77	20.62	688.36
69	4.25	RF+	7707.64	2194.99	90.85	277.57	1143.95	7594.24	5640.58	65.26	147.03	2125.88	31.26	335.01
70	4.95	RF+	na	na	na	na	na	na	na	na	na	na	na	na
71	5.05	RF+	na	na	na	na	na	na	na	na	na	na	na	na
72	4.11	RF+	6434.26	1025.41	68.17	54	401.88	79.34	4664.79	44.98	101.89	1870.62	32.73	88.34
73	5.36	RF+	0.1	0.1	0.1	0.1	0.1	0.1	0.1	0.1	na	na	na	na
74	5.82	RF-	9696.66	1112.13	62.52	122.41	439.95	2548.58	4237.55	25.34	163.24	2249.34	17.42	213.55
75	4.73	RF+	7809.63	1201.08	113.3	113.45	548.73	632.15	4664.79	56.51	93.27	2025.19	49.54	175.11
76	4.99	RF+	20868.4	6426.63	92.94	44.73	258.16	1333.26	2598.5	19.89	43.62	1432.51	14.1	70.1
