# Supplementary material for: Gut microbiome-immune interactions and their role in rheumatoid arthritis development
Source: PeerJ journal article supplement (doi:10.7717/peerj.17477), 2024-07-11
Supplement: RAW_DATA_FIGURE_5.xlsx [file RAW_DATA_FIGURE_5.xlsx]

## Sheet: raw-data-fig5.tsv
ID	group	IgG3	IgG4	IgA	IgG2	MCSF	MIP1a	FGF2	IL6	IL7F	GCSF	IFNy	IL15	IL2	IgM	IFNa2	IL9	TNFb	IL1RA	IL10	IL1a	PDGF_AB_BB	IL12 _p70	TNFa	IL17A	IL17E_IL25	IL5	FLT3L	IL1b	MIG	TGFa	IL18	GROa	IP10	VEGF_A	Eotaxin	IL22	sCD40L	k__Bacteria|p__Firmicutes|c__Clostridia|o__Lachnospirales|f__Lachnospiraceae|g__Dorea	k__Bacteria|p__Firmicutes|c__Clostridia|o__Clostridiales|f__Clostridiaceae|g__Clostridium_sensu_stricto_1	k__Bacteria|p__Firmicutes|c__Bacilli|o__Lactobacillales|f__Lactobacillaceae|g__Ligilactobacillus	k__Bacteria|p__Proteobacteria|c__Alphaproteobacteria|o__Rhizobiales|f__Rhizobiaceae|g__Phyllobacterium	k__Bacteria|p__Firmicutes|c__Negativicutes|o__Veillonellales-Selenomonadales|f__Veillonellaceae|g__Dialister	k__Bacteria|p__Proteobacteria|c__Alphaproteobacteria|o__Sphingomonadales|f__Sphingomonadaceae|g__Sphingomonas	k__Bacteria|p__Actinobacteriota|c__Coriobacteriia|o__Coriobacteriales|f__Coriobacteriaceae|g__Collinsella	k__Bacteria|p__Firmicutes|c__Clostridia|o__Oscillospirales|f__Oscillospiraceae|g__NK4A214_group	k__Bacteria|p__Firmicutes|c__Clostridia|o__Oscillospirales|f__Ruminococcaceae|g__Ruminococcus	k__Bacteria|p__Desulfobacterota|c__Desulfovibrionia|o__Desulfovibrionales|f__Desulfovibrionaceae|g__Desulfovibrio	k__Bacteria|p__Bacteroidota|c__Bacteroidia|o__Bacteroidales|f__Barnesiellaceae|g__Barnesiella
0	RA	2.68848	0.27648	2.4	5.43072	na	na	na	0.1	na	0.1	na	0.1	na	1.04912	0.1	0.1	na	0.1	na	0.1	na	0.1	0.1	na	0.1	na	0.1	na	0.1	na	0.1	na	0.1	0.1	0.1	na	na	1.69187	0.0657462	0.0394477	0.0438308	0	0.00438308	0.0942362	1.35656	2.81613	0.0197239	0.241069
1	RA	0.1	na	na	na	na	na	na	0.1	na	0.1	na	0.1	na	0.1	0.1	0.1	na	0.1	na	0.1	na	0.1	0.1	na	0.1	na	0.1	na	0.1	na	0.1	na	0.1	0.1	0.1	na	na	4.32441	0.210199	0	0.00218957	0.0240853	0	0.0503602	0.116047	2.76981	0.0613081	0.30873
2	RA	0.00128	3.03392	4.96	11.4859	1881.78	36.5	1764.93	57.01	607.96	2658.31	276.38	104.08	32	2.51808	856.8	272.66	111.82	142.86	101.3	30.87	85069.5	96.2	477.04	369.39	3662.41	14.1	69.28	179.73	5236.24	74.97	1107.4	75.03	1855.08	1457.1	1057.54	57.2	38271	1.97246	0.624032	0.0720037	0.0480024	0	0.00654579	0.091641	0.388383	1.73463	0.0480024	0.739674
3	RA	0.00128	0.51968	8.96	34.8778	2628.5	36.5	2224.85	353.53	828.29	3078.88	427.44	224.94	32	2.67152	714.71	382.17	154.92	204.87	55.91	55.06	124727	96.2	796.55	504.74	5069.02	38.47	97.09	307.42	6662.08	166.21	1473.45	106.09	1326.4	3797.44	745.06	57.2	338037	3.02599	0.150971	0.0262559	0	3.05663	0	0.122528	0.69797	3.63207	0.0371959	0.608262
4	RA	0.35424	0.00672	4.96	16.1707	1967.64	36.5	1922.64	85.56	838.22	2535.27	162.88	126.42	32	2.24336	607.85	304.66	70.1	142.86	71.62	39.29	50387.4	96.2	421.05	326.32	5454.2	29.79	60.23	196.02	10174.6	118.88	1460.67	106.09	2324.14	992.79	824.81	57.2	1338.35	2.31106	0.348302	0.0197152	0.0284775	0.116101	0.026287	0.22782	0.179628	1.71303	0.913472	0.674699
5	RA	0.00128	0.59568	16.48	73.1523	3406.25	36.5	4628.38	118.59	1298.98	4926.82	1894.72	429.11	128.37	5.62144	1688.28	763.16	1062	341.85	182.6	168.91	85614.3	1909.45	1615.73	1259.37	10150.5	46.82	173.81	1184.87	17082.5	274.43	566.81	242.96	2697.97	2430.61	1225.93	396.59	463939	2.09436	0.296371	0.00658602	0.096595	0.524687	0.241488	0.581765	0.368817	13.0096	0.00878137	1.12182
6	RA	3.1624	0.14704	3.2	13.1917	960.49	36.5	1489.74	62.93	383	3394.85	85.3	120.95	32	2.79456	607.85	33.9	70.1	185.75	39.32	17.2	96618.6	96.2	342.59	225.43	3288.88	44.07	55.59	69.2	10886.1	51	2199.64	75.03	1575.95	513	1957.71	57.2	69077.7	3.89749	0.637931	0.00436939	0.0983112	0	0.00873878	0.0852031	0.35829	2.99085	0.100496	0.148559
7	RA	0.38528	0.4368	2.72	11.8459	2708.37	36.5	2125.88	59.98	828.29	1314.1	623.66	192.3	32	0.80592	1023.89	439.21	100.29	499.17	143.05	165.77	130431	96.2	362.68	558.58	5069.02	29.79	90.85	501.29	5495.76	157.66	3814.99	106.09	877.87	1020.13	1301.03	57.2	22675.3	3.04883	0.242422	0.00218398	0.00436796	0.0262077	0	0.126671	0.165982	1.50039	0.128855	2.47226
8	RA	0.00128	0.00672	5.6	5.23936	1751.32	36.5	1656.88	84.18	403.71	2041.75	349.53	147.61	32	2.08288	764.12	332.99	62.76	182.24	122.51	68.2	94644.2	96.2	342.59	355.43	5069.02	23.75	74.8	255.06	6857.32	113.08	1447.84	93.27	906.65	2124.14	1079.47	666.02	67145.9	1.92925	0.65765	0.00218488	0.056807	0	0.00218488	0.076471	0.297144	2.25699	0.0284035	0.976644
9	RA	0.1	na	na	na	na	na	na	0.1	na	0.1	na	0.1	na	0.1	0.1	0.1	na	0.1	na	0.1	na	0.1	0.1	na	0.1	na	0.1	na	0.1	na	0.1	na	0.1	0.1	0.1	na	na	3.69473	0.216053	0.0174589	0	0.329536	0	0.122212	0.565231	2.54463	0.0567413	0.246606
10	RA	0.00128	0.00672	5.28	12.0898	910.09	36.5	1374.42	17.27	506.41	5395.1	85.3	80.15	32	1.33952	336.57	617.84	70.1	407.75	71.62	33.66	95145	96.2	401.88	10.6	4869.5	41.29	132.86	355.31	4968	77.93	3108.04	40.64	757.73	372.29	1699.46	188.73	29794	4.28112	0.205017	0.0551122	0.0705436	0	0.00220449	0.0440898	0.262334	2.34117	0.0352718	0.134474
11	RA	0.00128	0.3624	4.96	8.12048	na	na	na	0.1	na	0.1	na	0.1	na	1.1568	0.1	0.1	na	0.1	na	0.1	na	0.1	0.1	na	0.1	na	0.1	na	0.1	na	0.1	na	0.1	0.1	0.1	na	na	4.27867	0.315478	0.0197174	0.0262898	0.0109541	0.0153357	0.0460072	0.219082	3.40892	0.0810604	0.151167
12	RA	0.00128	0.10944	3.52	20.139	2052.68	36.5	2989.88	152.16	1240.72	4180.86	916.17	311.44	78.6	4.2096	1376.34	543.23	382.94	153.75	79.23	102.56	57736.8	96.2	513.26	852.44	8093.6	26.8	84.52	815.59	8209.23	207.26	330.78	213.44	947.03	694.26	885.29	57.2	15325.9	4.52503	0.24674	0	0	0.00220303	0	0.191664	0.473652	2.23167	0.0440606	0.211491
13	RA	3.268	0.91008	7.68	20.428	1251.93	36.5	1432.51	26.48	330.95	2893.08	85.3	131.81	32	4.95392	662.79	33.9	62.76	69.86	55.91	28.9	76830.8	96.2	548.73	279	4013.65	17.42	64.79	441.98	12169.7	60.05	534.14	108.17	4866.44	774.54	909.74	221.46	33253.7	3.22022	1.08071	0.0153448	0	0.0328818	0	0.0833005	0.221404	2.20089	0.0460345	1.70327
14	RA	0.39072	1.79696	3.84	14.8488	3022.91	36.5	2418.17	180.72	907.57	6178.35	394.85	269.25	32	3.12368	942.94	393.3	175.11	692.26	182.6	65.26	125782	96.2	684.34	225.43	7411.66	26.8	124.14	501.29	16803.8	176.16	5255.37	215.03	2483.51	5451.67	1026.36	345.11	4518000	2.55979	0.218598	0.0109299	0.104927	0.0502776	0.0240458	0.124601	0.281992	1.70725	0.616447	0.636121
15	RA	0.6144	1.79392	8.48	12.9002	1345.63	36.5	1711.22	282.9	393.36	5504.77	720.85	126.42	32	2.57408	635.73	213.36	100.29	42.21	101.3	33.66	91116.2	96.2	439.95	434.46	3781.73	35.62	83.45	69.2	13728.4	55.53	390.77	101.89	2037.33	524.16	1975.78	315.07	69077.7	3.86583	0.180667	0.0413574	0.0261205	0	0.00217671	0.0718313	0.095775	1.04482	0.0152369	0.646481
16	RA	0.8	na	na	na	na	na	na	0.8	na	0.8	na	0.8	na	0.8	0.8	0.8	na	0.8	na	0.8	na	0.8	0.8	na	0.8	na	0.8	na	0.8	na	0.8	na	0.8	0.8	0.8	na	na	5.97631	0.299362	0.00218512	0.087405	0.122367	0.0131107	0.107071	0.240364	2.79914	0.225068	0.192291
17	RA	0.00128	0.46912	6.24	13.4683	1881.78	36.5	1432.51	35.03	362.23	3204.36	85.3	67.36	32	1.04464	714.71	188.36	15.29	465.97	71.62	26.71	106837	96.2	362.68	225.43	3024.57	10.63	43.56	69.2	6884.91	89.73	4405.36	84.34	1044.55	2346.3	1147.86	517.09	237328	1.81651	0.0545828	0.00654993	0.00436662	0	0	0.36243	0.0764159	0.438845	0.179031	0.157198
18	RA	0.00128	3.712	10.4	10.6274	4290.83	39.43	4400.45	180.72	2225.6	3360.78	2227.17	421.59	268.03	4.6432	1470.14	564.78	2026.86	524.6	245.25	159.52	89453	1691.69	2257.91	898.54	12660.1	42.68	228.12	1136.24	29870.4	340.92	2786.59	159.7	5224.05	2712.45	2227.57	2564.19	191650	2.48721	0.343139	0.0152992	0	0.0021856	0	0.0677536	0.0983521	2.15282	0.295056	0.467719
19	RA	0.00128	0.47664	3.36	16.9891	2467.1	36.5	2125.88	47.86	506.41	4180.86	659.69	187.5	32	1.86528	2339.55	304.66	559.78	131.83	163.04	52.16	57673.4	96.2	1080.18	244.17	6521.16	23.7	138.59	421.23	6690.19	98.52	912.73	130.1	792.94	774.54	2064.69	751.24	10862.7	4.79707	0.269548	0	0	0.0175316	0	0.120529	0.254208	1.55373	0.0175316	0.341865
20	RA	0.1	na	na	na	na	na	na	0.1	na	0.1	na	0.1	na	0.1	0.1	0.1	na	0.1	na	0.1	na	0.1	0.1	na	0.1	na	0.1	na	0.1	na	0.1	na	0.1	0.1	0.1	na	na	5.49439	0.185327	0.0784912	0.0392456	0.170064	0.00218031	0.322686	0.231113	1.1403	0.0196228	1.00076
21	RA	2.75632	0.41856	4.48	6.47472	1345.63	36.5	1546.19	35.03	362.23	3987.09	85.3	80.15	32	2.29296	549.18	304.66	70.1	122.52	189.02	36.47	70147	96.2	342.59	184.31	5359.52	29.79	50.86	162.59	4020.07	51	1244.51	54.85	471.04	983.62	875.39	57.2	13287.2	3.89667	0.372154	0.00218914	0.00218914	0.0240806	0.00218914	0.0897548	0.161996	3.44133	0.0394046	0.232049
22	RA	0.00128	0.00672	2.88	9.79872	1156.65	36.5	1432.51	71.59	299.49	1379.42	162.88	73.84	32	3.6232	415.89	33.9	70.1	113.1	47.75	44.98	63893.2	96.2	311.77	261.97	1766.6	6.95	35.97	69.2	6662.08	32.6	299.01	88.85	1591.6	71.4	705.96	57.2	5046.57	2.42071	0.455252	0	0	0.0196984	0.00437742	0.140077	0.170719	8.35869	0.0766049	2.27407
23	RA	0.00128	0.64272	8.32	19.8826	1345.63	36.5	2224.85	200.37	708.57	2493.32	548.79	157.86	32	2.63904	662.79	281.08	88.34	97.75	101.3	40.71	62331	96.2	301.28	326.32	5454.2	2.86	61.38	343.68	7961	86.79	683.7	97.62	670.66	955.96	788.22	57.2	23141.2	1.83313	0.301125	0.0263759	0.327501	0.0263759	0.107702	0.129682	0.525321	1.24407	0.549499	0.406629
24	RA	0.00128	0.68368	10.08	10.9651	2507.67	36.5	1764.93	349.46	607.96	2698.44	1554.78	137.14	32	0.94944	764.12	404.06	62.76	95.81	71.62	69.67	101601	96.2	651.26	355.43	5913.22	45.45	259.97	294.81	38764.4	89.73	462.08	197.26	3670.94	2339.23	739.55	503.19	237328	5.29671	0.386446	0	0	0.115715	0	0.0502161	0.115715	3.51076	0.117899	0.135365
25	RA	na	na	na	na	na	na	na	na	na	na	na	na	na	na	na	na	na	na	na	na	na	na	na	na	na	na	na	na	na	na	na	na	na	na	na	na	na	1.48006	0.207383	0.0152808	0.0785872	0.0720382	0.00218298	0.141894	0.624331	1.38837	0.209566	0.945229
26	RA	0.00128	0.34384	5.76	13.0229	960.49	36.5	1374.42	86.93	567.46	3151.02	558.38	92.35	32	1.23984	336.57	201.34	70.1	44.42	115.52	25.34	53212.1	96.2	1108.66	184.31	3540.63	38.47	46.02	69.2	6463.02	80.89	591.42	60.13	1378.65	268.71	671.33	57.2	6730.35	6.28364	0.267991	0	0	0.117655	0	0.052291	0.248382	1.39443	0.0697213	0.95649
27	RA	0.00128	16.784	5.6	10.1898	647.4	36.5	1315.42	21.06	257.26	1503.9	85.3	22.29	32	7.18608	485.75	33.9	70.1	73.95	55.91	6.81	41435.6	96.2	212.7	10.6	1766.6	10.63	38.54	69.2	4020.07	35.7	876.65	34.41	300.21	71.4	885.29	57.2	1801.85	2.14818	0.363875	0.00876808	1.37001	0	2.01008	0.17317	0.236738	1.17273	0.302499	0.418676
28	RA	0.38528	1.22208	6.88	10.2602	910.09	36.5	1403.57	92.36	257.26	3971.91	85.3	3.1	32	0.8672	714.71	33.9	70.1	567.55	39.32	104.07	85367.2	96.2	332.42	10.6	5069.02	14.1	38.54	69.2	7049	66.04	3003.04	54.85	1583.79	2806.69	971.47	57.2	47463.6	2.21781	0.32493	0.00872296	0.0610607	0.111218	0.00654222	0.119941	0.165736	1.5287	0.137387	0.344557
29	RA	0.00128	0.36928	5.12	10.3254	2303.34	36.5	1711.22	70.16	597.85	3326.47	499.75	187.5	32	3.8288	811.39	297.06	70.1	135.52	86.7	47.84	59372.8	96.2	458.61	383	6771.16	20.62	48.45	196.02	5931.63	83.84	570.53	110.23	982.67	1205.83	761.42	1572.32	27101.9	2.23632	0.364001	0	0.00435929	0.132958	0	0.0610301	0.196168	5.43386	0.882757	0.638636
30	RA	0.92128	0.016	6.72	9.93392	1924.82	36.5	2025.19	59.98	485.97	1840.14	479.57	120.95	32	2.8384	714.71	382.17	154.92	129.97	101.3	46.41	111911	96.2	382.44	458.7	4869.5	32.73	55.59	281.9	7448.75	77.93	888.05	106.09	689.43	1020.13	999.15	834.8	40959.3	2.45956	0.324433	0.00657635	0	0.0328818	0	0.11399	1.13332	5.05941	0.0416502	4.71305
31	RA	0.00128	0.11328	4	8.71088	2010.26	36.5	1489.74	47.86	383	1314.1	208.47	104.08	32	1.27536	811.39	289.21	70.1	237.25	101.3	36.47	70578.2	96.2	477.04	10.6	3540.63	29.79	71.5	307.42	16427.6	55.53	620.41	101.89	2850.21	71.4	1331.85	57.2	6527.07	1.93022	0.609197	0.128827	0	0.061138	0	0.259837	0.467269	1.86689	0.157212	1.03498
32	RA	0.00128	3.776	5.44	5.28544	3022.91	36.5	1601.88	31.67	267.86	1563.46	250.16	67.36	32	1.30752	485.75	188.36	70.1	199.68	86.7	44.98	94720.6	96.2	858.54	10.6	3540.63	10.63	248.34	124.89	13904.4	54.02	2001.09	84.34	2058.2	2268.22	1343.3	1071.44	90479.5	4.4502	0.1002	0.00653481	0	0.0479219	0	0.0827742	0.159014	2.56382	0.187331	0.344167
33	RA	na	na	na	na	na	na	na	na	na	na	na	na	na	na	na	na	na	na	na	na	na	na	na	na	na	na	na	na	na	na	na	na	na	na	na	na	na	3.2234	1.49885	0.0241043	0.162156	0	0.262956	0.256382	0.499617	3.39432	0	0.961981
34	RA	1.5256	1.32944	3.68	9.964	3706.17	986.05	8861.94	210.61	2909.85	3879.97	2248.59	775.38	418.48	1.95328	2134.09	1856.04	382.94	582.25	568.94	346.38	170000	7959.31	926.68	2052.61	11507.2	90.41	297.42	2486.96	16788.2	592.38	1055.73	259.43	1248.78	2569.24	1156.23	269.01	5620200	6.31065	0.137378	0	0	0.0828627	0	0.18099	0.0675985	4.08208	2.16751	0.204976
35	RA	0.00128	0.45792	7.36	24.6403	3519.38	36.5	2811.61	154.58	2366.94	2930.9	3226.65	298.97	115.19	3.24416	1023.89	543.23	413.9	240.62	55.91	92	41504.8	96.2	780.83	628.53	18267.4	54.91	88.75	915.27	7343.54	367.09	282.59	135.84	1473.99	734.74	865.43	57.2	21315	2.46261	0.176837	0.0742277	0.0611287	0	0.00436634	0.0458465	0.499945	2.13296	0.026198	0.650584
36	RA	0.92864	0.37056	2.4	8.16016	1156.65	36.5	1285.55	31.67	299.49	479.12	85.3	104.08	32	1.82912	415.89	224.6	70.1	69.86	39.32	17.2	70371	96.2	311.77	225.43	2745.06	19.03	34.67	255.06	7500.99	63.04	779.86	97.62	1184.99	408.81	814.46	418.29	45962.6	3.61301	0.582181	0.00218045	0	0.0545114	0	0.0675941	0.152632	4.71196	0.0588723	0.370677
37	RA	1.95008	0.7688	4.64	9.32112	4146.39	36.5	2766.41	171.31	1722.44	3042.37	916.17	343.97	111.79	2.05488	1191.52	462.34	318.58	357.7	239.13	101.05	114302	96.2	858.54	771.58	10150.5	46.82	124.14	668.57	11997.2	340.92	2007.96	197.26	1509.4	794.21	895.12	599.14	45224.1	2.48786	0.301956	0.0393856	0.0328213	2.13557	0.0371975	0.144414	0.487944	2.39596	0.0262571	0.774583
38	RA	0.00128	4.688	8.32	13.8458	754.89	36.5	1518.06	50.95	557.31	4633.09	85.3	67.36	32	1.32512	336.57	33.9	70.1	53.12	55.91	25.34	111170	96.2	322.14	184.31	2446.63	20.62	48.45	69.2	6289.17	66.04	491.43	97.62	1600.96	1902.33	1840.78	57.2	19587.8	1.1983	0.240096	0.0240096	0.0349231	0.00873077	0.0523846	0.305577	0.154971	1.04551	0.150606	0.364509
39	RA	0	na	na	na	na	na	na	0	na	0	na	0	na	0	0	0	na	0	na	0	na	0	0	na	0	na	0	na	0	na	0	na	0	0	0	na	na	7.92486	0.332023	0.00873744	0	0.168196	0	0.0720839	0.467453	3.42289	0	0.227173
40	RA	0.1	na	na	na	na	na	na	0.1	na	0.1	na	0.1	na	0.1	0.1	0.1	na	0.1	na	0.1	na	0.1	0.1	na	0.1	na	0.1	na	0.1	na	0.1	na	0.1	0.1	0.1	na	na	5.0396	0.150144	0.015232	0.0239359	0	0.00435199	0.0304639	0.14144	1.95622	0.0217599	0.248063
41	RA	0.1	na	na	na	na	na	na	0.1	na	0.1	na	0.1	na	0.1	0.1	0.1	na	0.1	na	0.1	na	0.1	0.1	na	0.1	na	0.1	na	0.1	na	0.1	na	0.1	0.1	0.1	na	na	7.08462	0.305184	0.265946	0	0.130793	0	0.0261586	0.241967	1.04634	0.0348781	0.865414
42	RA	1991.94	88.34	88.34	88.34	2262	36.5	2025.19	93.7	536.98	4282.63	577.34	211.14	32	1991.94	1277.84	332.99	88.34	325.88	101.3	44.98	77029	96.2	583.51	628.53	5166.98	38.47	76.98	626.95	18081.5	94.13	1743.91	133.94	4706.69	1991.94	1249.94	197	152262	2.85241	0.089274	2.64338	0.0370161	0.100161	0	0.0740321	0.313548	1.74629	0.32008	0.363628
43	RA	0.00128	0.45552	3.68	8.7656	1345.63	36.5	1844.4	80.03	567.46	1813.84	193.78	67.36	32	5.01184	714.71	174.17	222.83	230.49	71.62	47.84	116804	96.2	1261.57	295.34	5454.2	17.42	41.07	421.23	6577.25	130.43	1558.51	156.12	739.82	1074.17	1518.98	666.02	113181	3.22813	0.351882	0	0.0371552	0.150806	0.104909	0.0830529	0.183591	3.9625	0.0262272	0.99882
44	RA	0.1	na	na	na	na	na	na	0.1	na	0.1	na	0.1	na	0.1	0.1	0.1	na	0.1	na	0.1	na	0.1	0.1	na	0.1	na	0.1	na	0.1	na	0.1	na	0.1	0.1	0.1	na	na	2.22654	0.143929	0	0.848308	0.113398	0.314027	0.218074	0.0545185	1.26919	0.0632415	0.894103
45	RA	0.00128	0.00672	6.24	9.49088	592.17	36.5	1315.42	24.71	193.14	1442.62	85.3	104.08	32	3.49968	485.75	33.9	62.76	124.39	39.32	80.04	56096.8	96.2	290.69	135.65	2745.06	6.95	53.24	69.2	4174.97	35.7	1684.28	31.12	617.65	673.75	665.45	57.2	6132.92	6.02373	0.242083	0.0261712	0	0	0	0.124313	0.353311	1.45904	0.0239902	0.276978
46	RA	0.55616	0.2384	4	16.9053	1251.93	36.5	2075.76	44.73	828.29	3879.97	459.02	215.77	32	2.54384	1311.25	289.21	301.89	126.26	115.52	77.07	56578.7	96.2	566.2	482.09	6002.38	20.62	85.58	547.95	7130.11	133.31	490.11	143.34	1635.05	71.4	1008.27	57.2	12034.1	2.92418	0.141739	0.0130836	0.0130836	0	0.0021806	0.154822	0.141739	1.90802	0.0414313	0.102488
47	RA	0.1	na	na	na	na	na	na	0.1	na	0.1	na	0.1	na	0.1	0.1	0.1	na	0.1	na	0.1	na	0.1	0.1	na	0.1	na	0.1	na	0.1	na	0.1	na	0.1	0.1	0.1	na	na	3.21346	0.312814	0.00656254	0.472503	0.288752	0.597191	0.203439	0.356565	1.77845	0.126876	0.365315
48	RA	0.00128	0.74704	6.4	13.435	4290.83	183.18	3729.69	106.96	2178.4	3926.13	1554.78	367.77	61.67	2.80048	1646.27	564.78	154.92	216.89	245.25	125.43	84932.6	1540.78	634.53	1014.39	8741.75	38.47	111.3	887.41	7021.82	318.82	508.43	159.7	577.67	2423.61	938.54	92.03	89316.5	2.83128	0.615873	0.0304672	0	3.67348	0	0.0718156	0.124045	1.23828	0.0326435	1.33621
49	RA	1.65824	2.25664	6.08	14.4949	16201.4	1568.14	15526.7	631.57	7016.81	6635.9	4843.11	1811.57	760.16	2.33648	5109.13	1576.45	902.43	1656.37	1297.4	1002.45	179342	8912.72	1983.59	3435.01	27676.6	363.31	423.65	3653.37	16959	1218.22	4531.62	683.76	1822.94	5786.57	1615.87	1555.14	8777700	2.18547	0.579596	0.00217893	0	1.80416	0.00217893	0.154704	0.10241	3.85018	0.193925	0.882468
50	RA	0.1	na	na	na	na	na	na	0.1	na	0.1	na	0.1	na	0.1	0.1	0.1	na	0.1	na	0.1	na	0.1	0.1	na	0.1	na	0.1	na	0.1	na	0.1	na	0.1	0.1	0.1	na	na	2.89604	0.499092	0.00875599	0	0	0	0.0656699	0.976293	1.53011	0	0.499092
51	RA	0.00128	0.40688	2.08	7.07504	1573.91	36.5	1844.4	38.33	414.04	3428.67	222.73	104.08	32	1.94464	714.71	245.23	33.37	77.99	71.62	39.29	127368	96.2	458.61	184.31	3781.73	23.75	75.9	124.89	7263.98	51	560.59	118.33	737.56	1932.34	2465.89	866.54	34464	2.13727	0.192902	0.0219207	0.0504176	0.030689	0.030689	0.0613779	1.18372	2.36305	0.120564	0.929437
52	RA	444.36	429.12	429.12	429.12	3854.13	36.5	2743.7	109.56	2891.21	3168.87	1187.32	269.25	74.53	444.36	1209.13	564.78	429.12	175.19	287.35	104.07	52246.6	96.2	804.38	754.72	8313.11	32.73	90.85	652.1	15015.9	483.51	740.23	135.84	1857.99	444.36	957.45	1132.15	13613.5	3.25731	3.22243	0.0196224	0	0.00218026	0	0.0784895	0.252911	1.06397	0.0152618	0.830681
53	RA	0.1	na	na	na	na	na	na	0.1	na	0.1	na	0.1	na	0.1	0.1	0.1	na	0.1	na	0.1	na	0.1	0.1	na	0.1	na	0.1	na	0.1	na	0.1	na	0.1	0.1	0.1	na	na	1.55549	0.411298	0.0284408	0.430987	0.0721958	0.255967	0.0656326	0.238465	0.977926	0.205649	0.137828
54	RA	0.00128	1.43568	4.16	10.9752	2668.5	204.73	2075.76	93.7	1201.8	10283.5	1807.88	242.96	42.25	2.3048	1500.49	693.79	375.08	450.76	115.52	89	84570.5	96.2	1007.97	526.72	7333.5	65.38	98.12	785.9	7910.75	170.48	4144.81	166.76	873.72	3207.15	1847.05	841.16	136311	1.92077	0.262221	0.0196665	1.26521	0.00218517	0.725477	0.0808513	0.161703	1.05762	0.0284072	0.469812
55	RA	0.00128	0.6616	32	38.7246	179.5	36.5	1255.43	9.03	171.51	1621.46	85.3	17.29	32	6.19968	241.08	33.9	70.1	351.37	21.23	19.89	128834	96.2	301.28	10.6	1766.6	6.95	62.52	69.2	11210.7	38.78	2084.57	70.2	1431.62	890.45	1494.16	57.2	115916	1.70065	0.135353	0.657119	0.338384	0.017465	0.362398	0.0829586	0.264158	1.13959	0.161551	0.275073
56	RA	0.00128	17.744	10.56	11.291	2178.81	36.5	2025.19	233	424.35	3879.97	499.75	177.79	32	4.1144	900.59	263.91	284.91	816.54	39.32	39.29	140792	96.2	617.67	295.34	5454.2	38.47	72.61	399.92	12491.2	110.18	5155.19	101.89	2147.56	4508.91	1609.07	57.2	127299	2.73099	0.358415	0	0	0.00879546	0.00219887	0.186904	0.734421	4.60442	0.389199	1.13461
57	RA	0.00128	0.00672	7.04	19.8798	3854.13	857.03	4070.05	156.99	1162.82	3239.58	1634.84	495.1	259.88	2.75488	1989.15	745.93	502.98	435.47	269.46	202.05	63710.1	2759.31	858.54	1507.95	11625.6	57.56	170.18	1684.75	9915.73	201.63	2155.04	276.96	1470.75	2196.53	1003.71	1404.93	107841	5.02732	0.365027	0.198907	0.636066	0	0.181421	0.251366	0.743169	0.749727	0.0743169	0.0808743
58	RA	0.00128	0.51648	7.36	22.6611	859.07	36.5	1656.88	47.86	383	4180.86	85.3	39.04	32	2.6024	549.18	254.78	133.9	48.8	101.3	18.54	77773.4	96.2	548.73	10.6	3540.63	23.75	86.64	69.2	12918.1	47.96	471.5	57.51	3381.76	1333.26	1053.12	57.2	13613.5	3.13464	0.109373	0.00437493	0	0	0	0.0853112	0.46593	2.06716	0.297495	1.41529
59	RA	0.00128	0.45472	6.4	25.4346	4505.51	504.48	6928.02	1196.01	5079.99	6678.34	5931.38	672.88	360.7	2.97008	2249.84	983.47	784.94	524.6	702.08	297.13	85601.9	2722.86	1234.2	1841.19	17172.9	450.02	181.01	2079.51	14831.5	814.56	675.63	268.25	1523.78	2873.44	943.29	1381.59	376054	3.13941	0.155113	0.028401	1.50088	0.00218469	1.51836	0.0808337	0.185699	1.02462	0.0873878	0.967819
60	RA	0.00128	1.0568	4.96	26.3221	3330.38	36.5	2418.17	84.18	3761.91	4952.91	1510.96	277.84	30.87	2.82896	1423.78	471.2	250	131.83	94.05	77.07	56535.2	96.2	495.25	589.24	10021.7	23.75	98.12	520.23	7049	486.24	503.22	101.89	1145.19	1162.45	798.78	612.62	23141.2	4.10782	0.198942	0.00218617	0	0	0.00218617	0.262341	0.146474	2.06375	0.144288	0.172708
61	RA	0.52896	0.21968	3.84	16.3168	1483.55	36.5	1574.13	129.98	236	3257.09	222.73	115.41	32	1.6512	415.89	33.9	33.37	61.58	47.75	25.34	37318.3	96.2	382.44	184.31	4454.34	15.77	69.28	79.43	7784.21	38.78	482.17	60.13	1195.73	197.33	585.77	403.85	2362.03	3.31516	0.135224	0	0.405671	0	0.484188	0.135224	0.115594	0.693566	0.0348964	0.126499
62	RA	na	na	na	na	na	na	na	na	na	na	na	na	na	na	na	na	na	na	na	na	na	na	na	na	na	na	na	na	na	na	na	na	na	na	na	na	na	3.38551	0.818619	0.0152403	0	0.134985	0	0.126276	0.161111	1.31502	0.0740241	0.498574
63	RA	0.00128	0.29728	2.56	6.52608	1881.78	36.5	1711.22	80.03	465.48	4136.71	539.14	115.41	32	2.62672	635.73	272.66	70.1	101.62	55.91	25.34	50154.2	96.2	382.44	261.97	5069.02	20.62	53.24	226.59	4618.66	54.02	225.14	116.33	617.65	71.4	717.26	57.2	4398.99	1.46728	0.585166	0.00436691	0	0	0	0.106989	0.626651	1.21182	0.0502194	0.334068
64	RA	1609.56	258.86	258.86	258.86	5548.37	743.24	4889.32	173.67	2460.93	5553.02	2651.24	466.12	192.49	1609.56	1862.51	636.36	258.86	290.29	396.48	165.77	80926.8	1935.02	1851.29	1121.92	9361.5	57.56	158.28	1226.56	6829.65	371.22	676.79	182.26	960.97	1609.56	845.27	1263.85	130258	2.66672	0.309881	0.0261872	0.0240049	0.0130936	0.0218226	0.0894728	0.117842	1.9073	0.082926	0.375349
65	RA	0.00128	1.51808	3.84	9.25376	1251.93	36.5	1489.74	31.67	299.49	3239.58	178.61	126.42	32	1.27408	1100.6	188.36	62.76	35.44	55.91	33.66	59087.6	96.2	362.68	184.31	2745.06	17.42	53.24	124.89	4363.44	38.78	449.84	79.74	382.55	71.4	1026.36	57.2	2571.85	3.12026	0.771276	0.00219737	0	0	0	0.0637237	0.349381	2.58191	0.232921	0.101079
66	RA	0.00128	0.57584	4	6.67296	1618.66	36.5	1601.88	41.56	320.48	3594.41	85.3	126.42	32	1.4072	662.79	188.36	33.37	602.73	115.52	25.34	112375	96.2	382.44	205.57	4013.65	17.42	92.94	307.42	3614.3	66.04	4371.68	70.2	782.02	1432.6	750.54	315.07	379091	2.92869	0.55378	0	0	0.155409	0	0.196997	0.240774	5.38239	0.135709	0.389616
67	RA	0.00128	0.06864	1.92	3.8248	1707.35	36.5	1432.51	41.56	587.73	2617.75	499.75	120.95	32	2.03344	1100.6	304.66	133.9	48.8	101.3	33.66	81834.4	96.2	513.26	326.32	5263.79	26.8	62.52	226.59	5992.18	51	419.34	99.76	612.73	308.79	1770.98	1416.58	1637.07	2.10788	0.381073	0.00217756	0.243887	0	0.280905	0.104523	0.145896	2.71759	0.0283083	1.28694
68	RA	0.00128	0.08496	7.04	13.6403	1528.88	36.5	2150.77	80.03	424.35	2930.9	946.99	215.77	32	4.1464	811.39	272.66	688.36	426.26	169.61	43.55	66521.3	96.2	889.02	355.43	5166.98	20.62	76.98	355.31	20387.9	72	1139.45	173.71	12526.8	1265.78	1347.1	57.2	9770.17	3.30324	0.204801	0.0110108	0.00220216	0	0	0.156353	0.414006	1.86082	0.0594583	0.596785
69	RA	0.00128	2.55344	4.48	12.1253	3138.98	36.5	2125.88	277.57	557.31	3326.47	349.53	234	17.04	1.93344	984	387.78	335.01	1553	208.08	65.26	138088	96.2	1143.95	568.92	5640.58	31.26	90.85	887.41	7707.64	160.52	8344.13	147.03	2194.99	7594.24	1557.49	1246.04	90479.5	2.74489	0.379286	0.103043	0.192932	0.0438481	0.234587	0.0438481	0.212663	3.44208	0.0460405	0.414365
70	RA	na	na	na	na	na	na	na	na	na	na	na	na	na	na	na	na	na	na	na	na	na	na	na	na	na	na	na	na	na	na	na	na	na	na	na	na	na	2.68562	0.143872	0.00653965	0	0.00435977	0	0.274665	0.130793	2.03383	0.0980948	0.658325
71	RA	na	na	na	na	na	na	na	na	na	na	na	na	na	na	na	na	na	na	na	na	na	na	na	na	na	na	na	na	na	na	na	na	na	na	na	na	na	4.05367	0.711247	0.00218174	0	0	0	0.0436348	0.220356	2.60936	0.0109087	0.294535
72	RA	0.00128	0.42784	5.6	17.4142	1437.9	36.5	1870.62	54	1084.63	2556.07	394.85	115.41	32	2.54592	714.71	358.61	88.34	131.83	115.52	44.98	54429.8	96.2	401.88	383	4664.79	32.73	68.17	281.9	6434.26	133.31	648.85	101.89	1025.41	79.34	835.08	439.78	1637.07	2.51661	0.392398	0.00219217	0.291558	0.00219217	0.153452	0.499814	0.771642	2.02775	0.0416511	0.957976
73	RA	0.1	na	na	na	na	na	na	0.1	na	0.1	na	0.1	na	0.1	0.1	0.1	na	0.1	na	0.1	na	0.1	0.1	na	0.1	na	0.1	na	0.1	na	0.1	na	0.1	0.1	0.1	na	na	3.59104	0.0435806	0.0370435	0.0239693	0	0.00871612	0.0522967	0.237514	11.3135	0.11331	0.710363
74	RA	0.00128	0.37184	6.56	12.9104	701.61	36.5	2249.34	122.41	496.2	4382.73	193.78	80.15	32	5.84864	714.71	118.97	213.55	213.46	55.91	25.34	140123	96.2	439.95	225.43	4237.55	17.42	62.52	268.67	9696.66	69.02	2736.1	163.24	1112.13	2548.58	1131.01	432.64	127299	2.71199	0.155409	0.0328328	0.0459659	0.0131331	0.0372105	0.0809876	0.361161	1.99842	0.308628	1.53876
75	RA	1.34224	0.36864	2.24	10.4914	1838.52	36.5	2025.19	113.45	485.97	1314.1	558.38	206.48	20.88	2.08192	1119.19	332.99	175.11	148.32	55.91	56.51	67883.1	96.2	548.73	493.5	4664.79	49.54	113.3	268.67	7809.63	72	1251.75	93.27	1201.08	632.15	694.54	770.66	11438.4	3.96991	0.888557	0.0967735	0.563046	0.0549849	0.569644	0.149559	0.431082	4.3922	0.653221	0.345305
76	RA	0.00128	0.76512	5.6	8.6736	1345.63	36.5	1432.51	44.73	214.63	1967.87	596.05	53.78	32	1.95232	241.08	33.9	70.1	657.82	149.77	19.89	68084.1	96.2	258.16	10.6	2598.5	14.1	92.94	69.2	20868.4	18.4	697.43	43.62	6426.63	1333.26	1131.01	659.39	6937.82	2.30076	0.240117	0.00654865	0.0611207	0.0196459	0.054572	0.102595	0.148436	1.43634	0.0502063	0.12879
77	Control	0.1	na	na	na	na	na	na	0.1	na	0.1	na	0.1	na	0.1	0.1	0.1	na	0.1	na	0.1	na	0.1	0.1	na	0.1	na	0.1	na	0.1	na	0.1	na	0.1	0.1	0.1	na	na	2.84792	0.327171	0.0373282	0	0	0	0.173466	1.0386	2.21115	0.00219578	0.300821
78	Control	12.2	na	na	na	na	na	na	12.2	na	12.2	na	12.2	na	12.2	12.2	12.2	na	12.2	na	12.2	na	12.2	12.2	na	12.2	na	12.2	na	12.2	na	12.2	na	12.2	12.2	12.2	na	na	1.95541	0.254291	0.0284981	0.675187	0	0.953592	0.135914	0.806717	0.971129	0.21264	0.118377
79	Control	4.4	na	na	na	na	na	na	4.4	na	4.4	na	4.4	na	4.4	4.4	4.4	na	4.4	na	4.4	na	4.4	4.4	na	4.4	na	4.4	na	4.4	na	4.4	na	4.4	4.4	4.4	na	na	3.7105	0.235865	0.00218393	0	0	0	0.63334	0.277359	0.923803	0.0262072	0.152875
80	Control	0.1	na	na	na	na	na	na	0.1	na	0.1	na	0.1	na	0.1	0.1	0.1	na	0.1	na	0.1	na	0.1	0.1	na	0.1	na	0.1	na	0.1	na	0.1	na	0.1	0.1	0.1	na	na	2.61139	0.473014	0.0152585	0.0588543	0	0.0479554	0.0850118	0.0893714	1.16183	0.00871916	1.15311
81	Control	885.61	103.2	103.2	103.2	28.13	28.13	166.3	24.59	210.54	3593.86	29.7	20.8	26.37	885.61	711.69	189.37	103.2	52.88	11.66	22.9	244960	74.5	555.24	28.13	11994.2	8.78	99.62	205.44	9841.12	101.25	570.32	110.78	1849.92	885.61	1170.8	1845.75	28781.8	2.46111	0.447276	0.0065455	0.442912	0	0.495276	0.91637	0.246547	1.53383	0.052364	1.7171
82	Control	1229.37	28.13	28.13	28.13	28.13	28.13	166.3	0.35	210.54	1445.46	1.73	20.8	13.8	1229.37	181.1	16.07	28.13	234.56	11.6	22.9	341775	74.5	314.84	28.13	1970.03	4.32	36.03	157.37	6949.94	50.49	2370.26	156.8	1651.36	1229.37	977.69	28.13	21560.2	2.98719	0.638084	0.0109261	0	0.0852235	0	0.0590009	0.480748	2.06066	0.181373	3.51602
83	Control	456.01	70.1	70.1	70.1	418.61	36.5	1315.42	24.71	257.26	2576.75	85.3	53.78	32	456.01	103.2	33.9	70.1	30.82	55.91	19.89	58594.1	96.2	279.98	10.6	2745.06	17.42	50.86	69.2	11450.3	29.48	311.88	31.12	707.95	456.01	447.44	269.01	4398.99	2.37751	0.177328	0.00875695	0	0.0853803	0	0.14449	0.91948	1.59158	0.0547309	0.264898
84	Control	3.5	na	na	na	na	na	na	3.5	na	3.5	na	3.5	na	3.5	3.5	3.5	na	3.5	na	3.5	na	3.5	3.5	na	3.5	na	3.5	na	3.5	na	3.5	na	3.5	3.5	3.5	na	na	1.60018	0.0593472	0.18024	0.00439609	0	0.00439609	0.219804	0.42642	2.66623	0.0197824	0.767117
85	Control	564.9	28.13	28.13	28.13	28.13	28.13	166.3	0.35	180.69	1011.69	4.42	20.8	13.8	564.9	245.77	325.92	28.13	26.04	69.13	22.9	113990	74.5	289.25	28.13	6697.67	31.55	18.53	100.32	4655.69	38.74	191.06	69.56	961.07	564.9	968.12	28.13	8418.18	1.81476	0.0546615	0.00218646	1.0495	0	0.675617	0.0896449	0.634074	1.97875	0.0240511	0.174917
86	Control	71.4	70.1	70.1	70.1	179.5	36.5	1489.74	17.27	149.73	943.53	85.3	67.36	32	71.4	103.2	33.9	70.1	16.1	11.5	11.92	40519.4	96.2	235.77	69.7	2446.63	6.95	33.36	69.2	3614.3	26.34	173.01	24.1	397.95	71.4	635.55	57.2	1078.49	2.00052	0.113691	0.0349819	0.470069	0.0590319	0.347632	0.131182	0.861428	2.70672	0.0153046	1.09537
87	Control	408.81	213.55	213.55	213.55	1437.9	36.5	1870.62	39.95	728.6	3833.42	301.58	294.78	32	408.81	1470.14	1306.89	213.55	97.75	245.25	77.07	24521.9	96.2	651.26	482.09	7015.57	189	290.98	676.73	5809.29	60.05	458.01	110.23	698.72	408.81	1261.85	530.92	3275.34	2.93424	0.192123	0.0109161	0.00218322	0	0	0.30565	1.1964	1.85792	0.00873286	0.471575
88	Control	26.159	23.7845	921.889	4.44281	na	na	na	0.1	na	0.1	na	0.1	na	511.846	0.1	0.1	na	0.1	na	0.1	na	0.1	0.1	na	0.1	na	0.1	na	0.1	na	0.1	na	0.1	0.1	0.1	na	na	2.68374	0.336561	0.0262255	0.0502655	0.0152982	0.0743056	0.100531	0.166095	4.23323	0.028411	0.972529
89	Control	1561.22	28.13	28.13	28.13	28.13	28.13	583.09	33.35	180.69	1445.46	1227.9	20.8	13.8	1561.22	314.21	104.09	28.13	175.78	22.46	22.9	470316	74.5	431.5	28.13	1970.03	20.66	47.41	205.44	6457.77	53.3	1402.42	131.63	1056.8	1561.22	1346.67	97.32	27634.5	2.54322	0.0327454	0.0349284	0.00654907	0	0	0.170276	0.275061	1.70713	0.0545756	0.316539
90	Control	1696.79	28.13	28.13	28.13	28.13	28.13	166.3	22.29	102.58	1158.27	0.35	20.8	13.8	1696.79	474.22	16.07	28.13	4.9	11.6	22.9	248674	74.5	314.84	28.13	28.13	22.52	57.95	11.45	11368.8	50.49	253.19	35.85	1597.26	1696.79	1042.51	896.72	9595.22	2.45057	0.128748	0.0305503	0.039279	0	0.0698294	0.0872867	0.2815	1.08672	0.0349147	0.469166
91	Control	866.06	28.13	28.13	28.13	28.13	28.13	166.3	0.35	118.72	1054.58	0.13	20.8	13.8	866.06	181.1	284.71	28.13	55.7	11.6	22.9	179845	74.5	262.62	28.13	28.13	1.82	27.75	11.45	7163.2	32.49	963.07	42.48	1857	866.06	767.17	28.13	9595.22	3.91755	0.0958689	0	0	0	0	0.108942	0.139446	1.57966	0.0305037	0.43141
92	Control	1609.56	70.1	70.1	70.1	859.07	36.5	1432.51	31.67	236	2089.97	193.78	92.35	32	1609.56	485.75	33.9	70.1	124.39	101.3	25.34	79925.1	96.2	322.14	184.31	3540.63	10.63	67.05	377.97	18583	47.96	1080.73	49.36	2181.49	1609.56	1277.61	619.34	133261	2.49443	0.128984	0.0109309	0.0306064	0.0196756	0.0306064	0.107123	0.312623	1.13025	0.461283	0.319182
93	Control	9.038	8.89678	501.855	0.633145	na	na	na	0.3	na	0.3	na	0.3	na	174.326	0.3	0.3	na	0.3	na	0.3	na	0.3	0.3	na	0.3	na	0.3	na	0.3	na	0.3	na	0.3	0.3	0.3	na	na	2.79893	0.421039	0.0261786	0.100351	0	0.301054	0.115622	0.133074	1.70161	0.0218155	0.938066
94	Control	0.7	na	na	na	na	na	na	0.7	na	0.7	na	0.7	na	0.7	0.7	0.7	na	0.7	na	0.7	na	0.7	0.7	na	0.7	na	0.7	na	0.7	na	0.7	na	0.7	0.7	0.7	na	na	2.31939	0.093823	0.0480024	0.183282	0	0.00654579	0.253104	0.0436386	0.864044	0.0130916	0.50839
95	Control	0.1	na	na	na	na	na	na	0.1	na	0.1	na	0.1	na	0.1	0.1	0.1	na	0.1	na	0.1	na	0.1	0.1	na	0.1	na	0.1	na	0.1	na	0.1	na	0.1	0.1	0.1	na	na	3.23521	0.398922	0.0219188	0.206036	0.598382	0.661947	0.146856	0.403305	3.88181	0.0591807	2.71793
96	Control	2.1	na	na	na	na	na	na	2.1	na	2.1	na	2.1	na	2.1	2.1	2.1	na	2.1	na	2.1	na	2.1	2.1	na	2.1	na	2.1	na	2.1	na	2.1	na	2.1	2.1	2.1	na	na	1.53169	0.0849729	0.2157	0.00217879	0	0	0.30721	0.0871517	0.97392	0.0501122	0.128549
97	Control	1.4	na	na	na	na	na	na	1.4	na	1.4	na	1.4	na	1.4	1.4	1.4	na	1.4	na	1.4	na	1.4	1.4	na	1.4	na	1.4	na	1.4	na	1.4	na	1.4	1.4	1.4	na	na	3.04858	0.177014	0	0	0.139863	0	0.157346	0.463297	1.44234	0.0458926	0.172644
98	Control	3.2	na	na	na	na	na	na	3.2	na	3.2	na	3.2	na	3.2	3.2	3.2	na	3.2	na	3.2	na	3.2	3.2	na	3.2	na	3.2	na	3.2	na	3.2	na	3.2	3.2	3.2	na	na	3.11547	0.430023	0.0263279	0.792031	0.01097	1.43487	0.234757	0.914895	2.95092	0.300577	0.221593
99	Control	470.81	28.13	28.13	28.13	28.13	28.13	166.3	9.68	150.14	1740.12	47.9	20.8	23.75	470.81	314.21	16.07	28.13	32.3	11.6	22.9	198523	74.5	339.54	28.13	28.13	3.5	27.75	11.45	9521.7	25.87	418.84	87.38	2654.66	470.81	928.99	1588.22	10460.3	3.37782	0.161368	0	0.030529	0	0.0566968	0.17009	0.1352	1.1492	0	0.577871
100	Control	0.1	na	na	na	na	na	na	0.1	na	0.1	na	0.1	na	0.1	0.1	0.1	na	0.1	na	0.1	na	0.1	0.1	na	0.1	na	0.1	na	0.1	na	0.1	na	0.1	0.1	0.1	na	na	1.12894	0.0436729	0.00873458	0	0.176875	0	0.242385	0.657277	2.14434	0.639808	0.545911
101	Control	9.1	na	na	na	na	na	na	9.1	na	9.1	na	9.1	na	9.1	9.1	9.1	na	9.1	na	9.1	na	9.1	9.1	na	9.1	na	9.1	na	9.1	na	9.1	na	9.1	9.1	9.1	na	na	1.23638	0.306903	0.0065765	0.00438433	0	0	0.164412	0.359515	1.56301	0.414319	0.355131
102	Control	3924.66	140.37	140.37	140.37	28.13	28.13	1206.07	24.59	297.02	2604.55	3.29	38.87	45.24	3924.66	561.52	310.08	140.37	90.62	69.13	522.58	422049	644.24	535.52	174.95	7792.04	38.5	61.32	724.91	7987.02	170.37	1156.12	287.59	1517.79	3924.66	1317.56	1078.87	35270.8	1.60059	0.113394	0.00654193	7.72384	0.00218064	3.87064	0.292206	0.194077	2.60805	0.0196258	0.0566968
103	Control	1359.62	28.13	28.13	28.13	28.13	28.13	400.55	33.35	150.14	1257.55	7.61	20.8	26.37	1359.62	561.52	16.07	28.13	82.79	42.07	22.9	276940	74.5	386.73	28.13	28.13	3.5	86.5	11.45	11620.5	103.58	1756.99	35.85	3164.39	1359.62	928.99	1404.16	37614.2	2.08852	0.0654707	0.00218236	0.307712	0	0.152765	0.1113	0.122212	0.715813	0.0501942	0.0632884
104	Control	1313.29	28.13	28.13	28.13	28.13	28.13	166.3	0.35	150.14	2103.65	2.04	20.8	13.8	1313.29	245.77	104.09	28.13	72.17	51.33	22.9	349465	74.5	363.47	28.13	28.13	20.66	27.75	11.45	6842.09	47.63	1516.39	35.85	1358.52	1313.29	1430.91	28.13	26347.6	2.02974	0.285602	0.0327025	0.12645	0.0457836	0.248539	0.0370629	0.165693	1.37787	0.0414232	0.38589
105	Control	653.05	88.34	88.34	88.34	960.49	36.5	1999.73	65.84	628.15	3879.97	499.75	177.79	36.76	653.05	764.12	289.21	88.34	128.12	143.05	110.15	72222.1	96.2	467.85	326.32	5069.02	17.42	99.15	331.83	5334.53	110.18	2314.27	122.3	1217.08	653.05	1369.78	2532.41	90479.5	2.34767	0.266434	0.152872	0.67482	0	0.5285	0.155056	0.718498	0.784014	0.401834	0.0895392
106	Control	2102.28	444.18	444.18	444.18	4146.39	254.38	3099.35	127.47	828.29	2698.44	1007.41	599.63	80.59	2102.28	1729.56	679.98	444.18	313.01	232.99	111.67	68814.2	96.2	1302.29	763.18	11625.6	29.79	142.39	1226.56	8452.67	117.43	991.2	163.24	1217.08	2102.28	1189.35	530.92	74069.1	2.83555	0.454387	0.0109228	0	0.0546138	0	0.0611674	0.294914	1.89182	0.17258	0.2687
107	Control	684.03	70.1	70.1	70.1	1059.58	36.5	1546.19	49.41	383	2207.21	289.1	120.95	32	684.03	607.85	304.66	70.1	120.65	55.91	42.13	57652.2	96.2	430.53	225.43	5640.58	20.62	71.5	226.59	9872.17	51	427.75	70.2	1593.16	684.03	904.88	284.51	4097.15	1.79237	0.231133	0.0457905	0.0239855	0	0.0414295	0.340158	0.497154	1.36063	0.00872201	0.449183
108	Control	1470.02	28.13	28.13	28.13	28.13	28.13	583.09	9.68	180.69	2618.14	19.59	20.8	13.8	1470.02	245.77	125.83	28.13	93.2	32.5	22.9	399041	74.5	339.54	131.82	3994.12	14.9	43.73	325.08	6678.72	82.05	883.22	114.4	536.94	1470.02	2301.73	1035.26	22144.9	2.3652	0.389486	0.150137	0	0.171896	0	0.137082	0.124026	0.757213	0	0.496105
109	Control	67.98	28.13	28.13	28.13	28.13	28.13	166.3	0.35	28.13	967.87	0	20.8	13.8	67.98	181.1	16.07	28.13	8.8	11.6	22.9	78943.9	74.5	173.86	28.13	28.13	3.5	21.9	11.45	4457.07	28.13	113.81	27.9	846.49	67.98	626.26	28.13	619.5	2.88916	0.301	0.430627	0.118642	0.0329562	0.351532	0.0768977	0.865649	1.20839	0.0153795	0.230693
110	Control	2906.65	184.94	184.94	184.94	2052.68	36.5	2025.19	77.24	485.97	2576.75	208.47	197.06	36.76	2906.65	856.8	201.34	184.94	171.65	129.42	71.15	93323.1	96.2	626.12	548.1	4237.55	26.8	153.64	331.83	5870.67	124.66	3388.42	88.85	1575.95	2906.65	1366.01	2025.7	63391.3	2.37991	0.397016	0.0152698	0.0392653	0	0.0414467	0.128703	0.220322	3.5666	0.211596	0.71332
111	Control	3069.35	28.13	28.13	28.13	28.13	28.13	124.2	15.01	180.69	1789.55	9.8	20.8	23.75	3069.35	711.69	125.83	28.13	44.26	51.33	22.9	400675	74.5	431.5	28.13	28.13	4.32	47.41	64.75	6568.7	82.05	1134.58	59.6	1605.06	3069.35	1042.51	1395.02	30707.4	2.18607	0.192182	0.00436777	15.4794	0	19.0981	0.111378	0.388731	0.646429	0.0786198	0.504477
112	Control	1.4	na	na	na	na	na	na	1.4	na	1.4	na	1.4	na	1.4	1.4	1.4	na	1.4	na	1.4	na	1.4	1.4	na	1.4	na	1.4	na	1.4	na	1.4	na	1.4	1.4	1.4	na	na	1.78424	0.220034	0.281034	0	0.230927	0	0.0740708	0.187356	0.681888	0.0348569	0.555531
113	Control	0.1	na	na	na	na	na	na	0.1	na	0.1	na	0.1	na	0.1	0.1	0.1	na	0.1	na	0.1	na	0.1	0.1	na	0.1	na	0.1	na	0.1	na	0.1	na	0.1	0.1	0.1	na	na	2.67456	0.168115	0.0502161	0.574211	0.0240164	0.772892	0.113532	0.312213	1.40169	0.366796	0.561111
114	Control	1633.7	19664	19664	19664	28.13	580.36	1305.75	22.29	165.51	1534.98	43.68	14.14	13.8	1633.7	778.59	208.29	19664	171.13	11.66	22.9	592320	74.5	339.54	46.12	7528.8	16.85	75.82	342.83	6733.39	71.98	2763.45	138.16	778.77	1633.7	1789.17	1995.93	36065.3	1.66245	0.433589	0.0174307	0.1133	0	0.185201	0.453199	0.233136	1.82805	0.00435768	0.440125
115	Control	963.28	28.13	28.13	28.13	28.13	28.13	166.3	9.68	165.51	569.64	1.73	20.8	13.8	963.28	314.21	16.07	28.13	4.9	11.66	22.9	234811	74.5	535.52	28.13	6697.67	3.5	74.26	11.45	9795.8	38.74	225.45	69.56	2349.17	963.28	928.99	769.9	12592	1.53292	0.148488	0.0567748	0.397423	0	0.0327547	0.0960804	0.399607	3.08331	0.286057	0.534993
116	Control	2.1	na	na	na	na	na	na	2.1	na	2.1	na	2.1	na	2.1	2.1	2.1	na	2.1	na	2.1	na	2.1	2.1	na	2.1	na	2.1	na	2.1	na	2.1	na	2.1	2.1	2.1	na	na	1.37055	0.339914	0.0065368	0.0348629	0.00435787	0.0479366	0.100231	0.135094	2.60165	0.00435787	0.0566523
117	Control	71.4	222.83	222.83	222.83	179.5	36.5	1315.42	4.26	257.26	2184.12	85.3	86.32	32	71.4	336.57	33.9	222.83	21.18	11.5	17.2	53591.1	96.2	362.68	10.6	1766.6	14.1	53.24	69.2	3083.46	10.24	318.23	49.36	562.32	71.4	904.88	403.85	854.76	2.43624	1.22252	0.0747581	0	0	0	0.171504	1.89534	1.52814	0.00219877	0.0923483
118	Control	4.7	na	na	na	na	na	na	4.7	na	4.7	na	4.7	na	4.7	4.7	4.7	na	4.7	na	4.7	na	4.7	4.7	na	4.7	na	4.7	na	4.7	na	4.7	na	4.7	4.7	4.7	na	na	2.35877	0.396782	0.00219217	0	0.0438433	0	0.0548041	0.598461	3.07122	0.0679571	0.861521
119	Control	2.5	na	na	na	na	na	na	2.5	na	2.5	na	2.5	na	2.5	2.5	2.5	na	2.5	na	2.5	na	2.5	2.5	na	2.5	na	2.5	na	2.5	na	2.5	na	2.5	2.5	2.5	na	na	1.91573	0.401931	0.0633478	0	0	0	0.799493	0.286157	2.82225	0.0240285	0.266498
120	Control	0.1	na	na	na	na	na	na	0.1	na	0.1	na	0.1	na	0.1	0.1	0.1	na	0.1	na	0.1	na	0.1	0.1	na	0.1	na	0.1	na	0.1	na	0.1	na	0.1	0.1	0.1	na	na	3.66703	0.067908	0.0591457	0.041621	0.124863	0.00438116	0.0788609	2.06134	5.0011	0.0219058	0.420591
121	Control	2.3	na	na	na	na	na	na	2.3	na	2.3	na	2.3	na	2.3	2.3	2.3	na	2.3	na	2.3	na	2.3	2.3	na	2.3	na	2.3	na	2.3	na	2.3	na	2.3	2.3	2.3	na	na	2.3087	0.319195	0.120245	0.524705	0.0787057	0.0940096	0.109314	0.419764	1.07564	0.0131176	0.209882
122	Control	1703.63	70.1	70.1	70.1	9927.14	36.5	1601.88	47.86	257.26	2065.96	276.38	92.35	32	1703.63	549.18	281.08	70.1	213.46	71.62	72.62	79898.2	96.2	495.25	225.43	2123.61	20.62	90.85	196.02	7961	54.02	1082.64	65.24	2058.2	1703.63	989.98	1010.12	28696.7	4.88548	0.267787	0.261256	0	2.46016	0	0.0304798	0.180702	1.93765	0.0957938	0.400592
123	Control	2.2	na	na	na	na	na	na	2.2	na	2.2	na	2.2	na	2.2	2.2	2.2	na	2.2	na	2.2	na	2.2	2.2	na	2.2	na	2.2	na	2.2	na	2.2	na	2.2	2.2	2.2	na	na	2.01431	0.219423	0	0.00219423	0	0.00219423	0.0877693	0.322552	3.15311	0.0811866	3.20358
124	Control	1780.84	70.1	70.1	70.1	535.76	36.5	1601.88	38.33	278.42	2535.27	162.88	22.29	32	1780.84	415.89	289.21	70.1	216.89	129.42	30.87	73666.6	96.2	279.98	261.97	4454.34	14.1	72.61	69.2	7553	47.96	2055.1	43.62	1086.09	1780.84	677.18	359.95	27626.7	2.09506	0.0567413	0.0109118	0.00436472	0	0.00218236	0.1855	0.279342	2.21073	0.0698354	0.163677
125	Control	0.1	na	na	na	na	na	na	0.1	na	0.1	na	0.1	na	0.1	0.1	0.1	na	0.1	na	0.1	na	0.1	0.1	na	0.1	na	0.1	na	0.1	na	0.1	na	0.1	0.1	0.1	na	na	2.28405	0.354083	0.0961707	0.236055	0	0.301626	0.109285	0.371568	1.84036	0.050271	0.338783
126	Control	0.8	na	na	na	na	na	na	0.8	na	0.8	na	0.8	na	0.8	0.8	0.8	na	0.8	na	0.8	na	0.8	0.8	na	0.8	na	0.8	na	0.8	na	0.8	na	0.8	0.8	0.8	na	na	2.03605	0.301882	0.00440703	0.0925477	0.0286457	0.107972	0.130007	1.15685	2.94831	0.0903442	0.771231
127	Control	5.3	na	na	na	na	na	na	5.3	na	5.3	na	5.3	na	5.3	5.3	5.3	na	5.3	na	5.3	na	5.3	5.3	na	5.3	na	5.3	na	5.3	na	5.3	na	5.3	5.3	5.3	na	na	1.76815	0.124579	0.0174848	0.0458976	0.0174848	0.0349696	0.113651	0.242602	1.11684	0.450234	0.583556
128	Control	0.1	na	na	na	na	na	na	0.1	na	0.1	na	0.1	na	0.1	0.1	0.1	na	0.1	na	0.1	na	0.1	0.1	na	0.1	na	0.1	na	0.1	na	0.1	na	0.1	0.1	0.1	na	na	1.91048	0.325328	0.124454	0.676856	0.0524018	0.469432	0.0764192	0.242358	2.41048	0.0720524	0.355895
129	Control	535.25	70.1	70.1	70.1	859.07	36.5	1374.42	21.06	236	2252.89	85.3	53.78	32	535.25	485.75	158.4	70.1	379.72	21.23	17.2	76574.9	96.2	342.59	69.7	3781.73	14.1	80.23	69.2	6967.27	60.05	1786.19	95.45	1385.32	535.25	971.47	783.56	17956.9	2.13106	0.160049	0.0438491	0.129355	0.00219245	0.0438491	0.24117	0.405604	2.44239	0.523996	0.274057
130	Control	2884.87	28.13	28.13	28.13	28.13	28.13	1305.75	0.35	86.09	57.95	0.83	20.8	31.39	2884.87	841.53	16.07	28.13	191.89	11.66	22.9	663340	74.5	442.37	28.13	3994.12	22.52	57.95	100.32	7835.85	44.73	2342.7	107.09	905.01	2884.87	2914.12	28.13	56362.4	2.15213	0.511893	0.00653481	0.117627	0	0.28971	0.677442	0.104557	2.0345	0.0370306	1.29389
131	Control	0.9	na	na	na	na	na	na	0.9	na	0.9	na	0.9	na	0.9	0.9	0.9	na	0.9	na	0.9	na	0.9	0.9	na	0.9	na	0.9	na	0.9	na	0.9	na	0.9	0.9	0.9	na	na	2.47516	1.31746	0.170701	0.319517	0.0328271	0.146628	0.310763	0.319517	2.17972	0.218847	0.260428
132	Control	2528.52	28.13	28.13	28.13	28.13	28.13	867.41	9.68	210.54	1980.96	5.84	20.8	13.8	2528.52	601.61	189.37	28.13	32.3	69.13	22.9	496282	98.24	409.39	28.13	1970.03	12.91	47.41	11.45	4457.07	61.5	599.7	35.85	1509.69	2528.52	1444.53	178.18	44377.7	0.358306	0.0586319	0.171553	0	0.00217155	0	0.0412595	0.0238871	0.325733	0.0152009	0.112921
133	Control	2367.46	284.91	284.91	284.91	1251.93	36.5	1345.04	62.93	506.41	407.12	325.93	224.94	32	2367.46	635.73	488.35	284.91	35.44	101.3	136.22	108674	96.2	477.04	482.09	9760.93	49.54	30.71	162.59	10429.2	54.02	438.85	106.09	1108.43	2367.46	1237.97	3392.78	28696.7	2.61634	0.130599	0	0.130599	0	0.202429	0.0435332	0.0413565	1.14275	0.0740064	0.163249
134	Control	1813.19	28.13	28.13	28.13	5734.75	658.62	3335.94	108.95	1339.83	2396.2	2289700	57.4	135.34	1813.19	1140.52	348.33	28.13	166.47	150.62	22.9	459404	3286.21	495.08	486.44	8547.63	12.91	98.19	650.39	84708.5	294.35	1463.35	201.3	2988.56	1813.19	1302.79	442.72	32966.9	2.44168	1.36569	0.00435625	0.61641	0	0.72096	0.0631657	0.154647	0.620766	0.0283157	0.444338
135	Control	0.1	na	na	na	na	na	na	0.1	na	0.1	na	0.1	na	0.1	0.1	0.1	na	0.1	na	0.1	na	0.1	0.1	na	0.1	na	0.1	na	0.1	na	0.1	na	0.1	0.1	0.1	na	na	4.67808	0.124487	0.268629	0	0.200926	0	0.0371276	1.03521	1.46108	0.0895431	0.648642
136	Control	1021.01	28.13	28.13	28.13	28.13	28.13	166.3	0.35	86.09	1822.13	2.41	20.8	13.8	1021.01	181.1	16.07	28.13	128.26	32.5	22.9	266687	74.5	431.5	28.13	28.13	3.5	39.94	11.45	14761.4	25.87	1978.67	27.9	4252.04	1021.01	1112.54	1121.39	10460.3	3.47128	0.306225	0.0306225	1.32552	1.24021	0.419966	0.229669	0.3106	2.76696	0.0546831	2.62041
137	Control	0.1	na	na	na	na	na	na	0.1	na	0.1	na	0.1	na	0.1	0.1	0.1	na	0.1	na	0.1	na	0.1	0.1	na	0.1	na	0.1	na	0.1	na	0.1	na	0.1	0.1	0.1	na	na	3.3546	0.198872	0.0152979	0	0	0	0.211985	0.657808	2.69898	0.0240395	0.541982
138	Control	2842.74	28.13	28.13	28.13	1536.03	501.05	166.3	39.59	380.15	625.86	15.71	20.8	23.75	2842.74	1347.64	241.75	28.13	252.14	119.11	22.9	754538	434.9	621.99	213.28	10998.3	24.37	87.98	425.67	6401.94	178.44	2138.74	216.58	1961.15	2842.74	1696.92	1223.52	43501.6	2.2131	0.111419	0.0218469	0.0436939	0.0152929	0.0196622	0.155113	0.240316	0.882616	0.056802	0.692548
139	Control	1	na	na	na	na	na	na	1	na	1	na	1	na	1	1	1	na	1	na	1	na	1	1	na	1	na	1	na	1	na	1	na	1	1	1	na	na	2.76891	0.675292	0.0524498	0.13331	0.0437082	0.168277	0.0743039	0.450194	1.50575	0.0131125	0.23821
140	Control	4.5	na	na	na	na	na	na	4.5	na	4.5	na	4.5	na	4.5	4.5	4.5	na	4.5	na	4.5	na	4.5	4.5	na	4.5	na	4.5	na	4.5	na	4.5	na	4.5	4.5	4.5	na	na	8.79991	0.238486	0	0	0	0	0.0634504	0.22317	2.83995	0.0284433	0.188163
141	Control	1.4	na	na	na	na	na	na	1.4	na	1.4	na	1.4	na	1.4	1.4	1.4	na	1.4	na	1.4	na	1.4	1.4	na	1.4	na	1.4	na	1.4	na	1.4	na	1.4	1.4	1.4	na	na	2.16002	0.0962927	0.0569002	1.2715	0.0240732	0.323894	0.10067	0.389548	1.45533	0.203528	0.31514
142	Control	1641.1	88.34	88.34	88.34	535.76	36.5	1546.19	50.95	393.36	2184.12	85.3	104.08	32	1641.1	764.12	874.54	88.34	162.74	94.05	50.72	49231.8	96.2	322.14	295.34	5263.79	98.88	204.87	281.9	11390.7	92.66	2894.34	137.73	1262.74	1641.1	469.78	659.39	4097.15	2.65246	0.305131	0.191796	0.0326926	0	0.013077	0.104616	0.196155	1.23142	0.0021795	0.435901
143	Control	1248.08	28.13	28.13	28.13	28.13	28.13	166.3	3.48	118.72	395.7	0.68	20.8	13.8	1248.08	245.77	16.07	28.13	88.02	11.6	22.9	363182	74.5	453.13	28.13	28.13	4.32	23.29	11.45	4655.69	41.77	1436.22	69.56	1004.38	1248.08	1051.49	597.13	14143.4	2.73658	0.231507	0.00218403	0.00218403	0	0	0.0786249	0.476118	3.6102	0.345076	0.246795
144	Control	2.6	na	na	na	na	na	na	2.6	na	2.6	na	2.6	na	2.6	2.6	2.6	na	2.6	na	2.6	na	2.6	2.6	na	2.6	na	2.6	na	2.6	na	2.6	na	2.6	2.6	2.6	na	na	4.52398	0.441948	0.00435417	0	0	0	0.078375	0.130625	1.55008	0	0.14151
145	Control	6.6	na	na	na	na	na	na	6.6	na	6.6	na	6.6	na	6.6	6.6	6.6	na	6.6	na	6.6	na	6.6	6.6	na	6.6	na	6.6	na	6.6	na	6.6	na	6.6	6.6	6.6	na	na	2.0225	0.246806	0.0131047	0.0458666	0	0.0611554	0.0764442	1.293	2.20815	0.00218412	0.810309
146	Control	1723.74	103.2	103.2	103.2	28.13	28.13	1305.75	131.13	617.02	2324.77	211300	57.4	31.39	1723.74	1065.15	256.86	103.2	93.2	196.11	22.9	672382	1215.77	495.08	213.28	5462.89	86.53	106.66	360.14	9150.08	149.74	1339.08	91.52	3358.43	1723.74	1361.02	1449.3	41846.5	3.43842	0.170176	0.00218174	0	0	0	0.253082	0.233446	2.22101	0	0.656703
147	Control	928.06	70.1	70.1	70.1	1010.31	36.5	1461.23	28.24	403.71	1678.01	162.88	104.08	32	928.06	635.73	43.52	70.1	220.3	39.32	30.87	90289.2	96.2	332.42	225.43	3540.63	10.63	73.71	69.2	5035.94	52.51	1140.39	67.74	873.72	928.06	1079.47	345.11	12034.1	2.63002	0.118154	0.0240684	0.0240684	0.0131282	0.0240684	0.124718	0.398223	1.1706	0.177231	0.754874
148	Control	1813.19	28.13	28.13	28.13	28.13	28.13	166.3	19.93	150.14	1740.12	2.41	20.8	13.8	1813.19	373.11	104.09	28.13	72.17	51.33	22.9	398467	74.5	314.84	28.13	28.13	12.91	69.5	11.45	9886.33	58.8	1455.87	48.57	1961.15	1813.19	1112.54	1013.02	33471.1	3.01551	0.115478	0.00435768	3.35323	0	3.34234	0.115478	0.165592	1.13082	0.0239672	0.137267
149	Control	14.9	na	na	na	na	na	na	14.9	na	14.9	na	14.9	na	14.9	14.9	14.9	na	14.9	na	14.9	na	14.9	14.9	na	14.9	na	14.9	na	14.9	na	14.9	na	14.9	14.9	14.9	na	na	6.02639	0.252105	0	0.0482287	0.124956	0.100842	0.122764	0.195107	5.96501	0.0569975	0.523939
150	Control	1.3	na	na	na	na	na	na	1.3	na	1.3	na	1.3	na	1.3	1.3	1.3	na	1.3	na	1.3	na	1.3	1.3	na	1.3	na	1.3	na	1.3	na	1.3	na	1.3	1.3	1.3	na	na	2.95793	0.305617	0	0.0764042	0	0.0764042	0.650527	0.152808	3.50368	0.999804	0.462791
151	Control	1.6	na	na	na	na	na	na	1.6	na	1.6	na	1.6	na	1.6	1.6	1.6	na	1.6	na	1.6	na	1.6	1.6	na	1.6	na	1.6	na	1.6	na	1.6	na	1.6	1.6	1.6	na	na	3.02267	0.249699	0.013142	0	0	0	0.38331	1.52667	2.87592	0.00219034	0.694338
152	Control	0.1	na	na	na	na	na	na	0.1	na	0.1	na	0.1	na	0.1	0.1	0.1	na	0.1	na	0.1	na	0.1	0.1	na	0.1	na	0.1	na	0.1	na	0.1	na	0.1	0.1	0.1	na	na	1.4461	0.346188	0.243208	3.10473	0.0438212	3.49036	0.0942156	0.880806	1.71779	0.0197195	0.37248
153	Control	4.6	na	na	na	na	na	na	4.6	na	4.6	na	4.6	na	4.6	4.6	4.6	na	4.6	na	4.6	na	4.6	4.6	na	4.6	na	4.6	na	4.6	na	4.6	na	4.6	4.6	4.6	na	na	2.02102	1.46684	0.448628	0.952234	0.31228	1.96165	0.246305	1.53721	1.50202	0.0747713	0.213318
154	Control	205.07	28.13	28.13	28.13	28.13	28.13	166.3	0.35	150.14	2295.9	1.73	20.8	13.8	205.07	181.1	16.07	28.13	44.26	11.6	22.9	297476	74.5	276.08	28.13	3099.22	4.32	36.03	11.45	9008.81	18.71	936.62	7.28	1533.9	205.07	1389.34	1906.69	20102.7	2.64275	0.274289	0.00653068	0.0239458	0	0.0718375	0.0674837	0.171975	0.920826	0.00653068	0.348303
155	Control	1.6	na	na	na	na	na	na	1.6	na	1.6	na	1.6	na	1.6	1.6	1.6	na	1.6	na	1.6	na	1.6	1.6	na	1.6	na	1.6	na	1.6	na	1.6	na	1.6	1.6	1.6	na	na	2.32528	0.149169	0	1.86241	0	2.39767	0.206204	1.55311	1.09025	0.357566	0.197429
156	Control	667.15	28.13	28.13	28.13	28.13	28.13	400.55	24.59	282.87	1218.32	8.65	20.8	13.8	667.15	929.98	175.64	28.13	55.7	42.07	22.9	297054	74.5	420.51	79.82	8301.04	20.66	64.63	11.45	5946.29	38.74	180.76	162.73	1318.95	667.15	1226.65	657.92	25426.8	1.95971	0.364446	0	1.19372	0	0.949305	0.0894747	0.148397	1.3072	0.392816	0.242236
157	Control	2.8	na	na	na	na	na	na	2.8	na	2.8	na	2.8	na	2.8	2.8	2.8	na	2.8	na	2.8	na	2.8	2.8	na	2.8	na	2.8	na	2.8	na	2.8	na	2.8	2.8	2.8	na	na	1.65521	0.260542	0.0284626	0.197049	0.0240837	0.15326	0.243027	0.571441	1.55668	0.126987	0.295573
158	Control	3.3	na	na	na	na	na	na	3.3	na	3.3	na	3.3	na	3.3	3.3	3.3	na	3.3	na	3.3	na	3.3	3.3	na	3.3	na	3.3	na	3.3	na	3.3	na	3.3	3.3	3.3	na	na	3.10545	0.0217927	0.0108963	0.00435853	0	0	0.281125	0.0762743	1.57561	0.0130756	0.610195
159	Control	2.2	na	na	na	na	na	na	2.2	na	2.2	na	2.2	na	2.2	2.2	2.2	na	2.2	na	2.2	na	2.2	2.2	na	2.2	na	2.2	na	2.2	na	2.2	na	2.2	2.2	2.2	na	na	3.19471	1.10125	0.00654208	0.0545173	0.137384	0.0785049	1.29969	0.154829	2.18287	0.0610594	0.676015
160	Control	7.7	na	na	na	na	na	na	7.7	na	7.7	na	7.7	na	7.7	7.7	7.7	na	7.7	na	7.7	na	7.7	7.7	na	7.7	na	7.7	na	7.7	na	7.7	na	7.7	7.7	7.7	na	na	0.882872	0.161315	0.0501384	0.0283391	0	0.0566782	0.135156	0.0871973	0.922111	0.104637	0.217993
161	Control	2008.1	28.13	28.13	28.13	28.13	28.13	1579.35	31.22	180.69	395.7	29.7	20.8	26.37	2008.1	245.77	144.34	28.13	41.33	11.66	22.9	325248	74.5	339.54	28.13	1970.03	4.32	98.19	248.45	6176.2	96.55	472.9	35.85	1185.59	2008.1	1272.81	1057.21	29063.1	1.8111	0.306225	0.00437464	0	0	0	0.107179	0.85743	1.61424	0	0.448401
162	Control	2.4	na	na	na	na	na	na	2.4	na	2.4	na	2.4	na	2.4	2.4	2.4	na	2.4	na	2.4	na	2.4	2.4	na	2.4	na	2.4	na	2.4	na	2.4	na	2.4	2.4	2.4	na	na	2.60927	0.221273	0.0262898	0.00438164	0	0	0.567423	0.451309	1.43718	0.0153357	0.0832512
163	Control	3.1	na	na	na	na	na	na	3.1	na	3.1	na	3.1	na	3.1	3.1	3.1	na	3.1	na	3.1	na	3.1	3.1	na	3.1	na	3.1	na	3.1	na	3.1	na	3.1	3.1	3.1	na	na	2.42581	0.42397	0.00218541	0	0	0	0.0743039	0.448009	1.768	0.0896018	0.863237
164	Control	0.5	na	na	na	na	na	na	0.5	na	0.5	na	0.5	na	0.5	0.5	0.5	na	0.5	na	0.5	na	0.5	0.5	na	0.5	na	0.5	na	0.5	na	0.5	na	0.5	0.5	0.5	na	na	2.52149	0.210489	0.0570075	0.10963	0.0833187	0.140326	0.149097	0.71698	1.24759	0.0942817	0.111822
165	Control	1040.16	28.13	28.13	28.13	28.13	28.13	166.3	0.35	268.63	395.7	1.73	20.8	13.8	1040.16	181.1	16.07	28.13	8.8	11.6	22.9	149687	74.5	262.62	28.13	1970.03	6.6	39.94	11.45	8383.47	18.71	155.13	91.52	1213.99	1040.16	867.44	967.57	8903.72	3.17252	0.153156	0.0875178	0.72421	0	0.0809539	0.207855	0.77672	8.99902	0.140028	0.150968
166	Control	2304.82	19664	19664	19664	2295.24	28.13	1663.91	49.52	460.87	1408.88	362.88	137.71	95.47	2304.82	711.69	195.88	19664	93.2	135	36.44	538702	322.02	474.31	410.7	6697.67	27.99	101.04	393.58	9750.38	132.68	959.01	188.05	2867.6	2304.82	1794.8	2290.98	61649.4	3.84397	0.556623	0.0283768	1.02593	0	1.31188	0.224832	0.172444	2.82459	0.412556	0.318694
167	Control	2866.79	70.1	70.1	70.1	859.07	36.5	1374.42	41.56	320.48	2893.08	162.88	80.15	32	2866.79	415.89	43.52	70.1	153.75	21.23	47.84	145442	96.2	495.25	225.43	3781.73	6.95	110.3	69.2	10596.8	44.91	427.75	141.48	1154.29	2866.79	1547.04	828.42	2520900	1.3377	0.172395	0.0261866	0.846699	0.0349154	1.18276	0.106929	0.333879	1.03655	0.0130933	0.11784
168	Control	0.1	na	na	na	na	na	na	0.1	na	0.1	na	0.1	na	0.1	0.1	0.1	na	0.1	na	0.1	na	0.1	0.1	na	0.1	na	0.1	na	0.1	na	0.1	na	0.1	0.1	0.1	na	na	2.99749	0.528192	0.011004	0	0	0	0.125446	0.930939	3.11633	0.0176064	0.211277
169	Control	481.38	28.13	28.13	28.13	28.13	28.13	166.3	12.41	617.02	1552.58	1.21	20.8	13.8	481.38	373.11	202.18	28.13	12.59	32.5	22.9	76940	74.5	351.6	174.95	4767.67	12.91	67.89	182.19	4720.96	61.5	133.26	64.69	822.3	481.38	778.86	28.13	8903.72	2.01506	0.0764109	0.0327475	0.00436634	0	0	0.48903	0.954044	2.39494	0.0218317	0.211767
170	Control	2.9	na	na	na	na	na	na	2.9	na	2.9	na	2.9	na	2.9	2.9	2.9	na	2.9	na	2.9	na	2.9	2.9	na	2.9	na	2.9	na	2.9	na	2.9	na	2.9	2.9	2.9	na	na	0.73117	0.0392867	0.0021826	0.0283737	0.0021826	0.00436519	0.0305563	0.488901	0.292468	0.0480171	0.0763909
171	Control	0.3	na	na	na	na	na	na	0.3	na	0.3	na	0.3	na	0.3	0.3	0.3	na	0.3	na	0.3	na	0.3	0.3	na	0.3	na	0.3	na	0.3	na	0.3	na	0.3	0.3	0.3	na	na	1.80677	0.149283	0	8.06569	0	4.24579	0.13172	1.09987	1.24037	0.0285394	0.302957
172	Control	1759.59	28.13	28.13	28.13	28.13	28.13	1491.77	49.52	393.75	3211.26	618.39	20.8	13.8	1759.59	561.52	236.5	28.13	273.84	11.6	22.9	289800	98.24	363.47	28.13	7792.04	20.66	61.32	675.68	6345.88	115.01	3639.39	91.52	1097.51	1759.59	1186.99	28.13	24692	2.34062	0.164369	0.0525981	1.21852	0.0788972	1.7971	0.33093	0.718841	1.34783	0.0635561	0.190668
173	Control	22.8	na	na	na	na	na	na	22.8	na	22.8	na	22.8	na	22.8	22.8	22.8	na	22.8	na	22.8	na	22.8	22.8	na	22.8	na	22.8	na	22.8	na	22.8	na	22.8	22.8	22.8	na	na	1.85181	0.128841	0.0109187	1.36047	0	0.345031	0.0436748	0.128841	0.869128	0.0393073	0.255498
174	Control	2910.11	28.13	28.13	28.13	28.13	28.13	166.3	0.35	51.62	923.06	2.41	20.8	13.8	2910.11	181.1	16.07	28.13	72.17	32.5	177.08	527085	98.24	351.6	79.82	28.13	8.78	47.41	11.45	6401.94	132.68	1878.21	48.57	2603.95	2910.11	1375.25	1638.39	28687.6	1.97689	0.14854	0	0.342952	0	0.107036	0.0677166	0.0961139	1.30409	0.058979	1.87859
175	Control	0.1	na	na	na	na	na	na	0.1	na	0.1	na	0.1	na	0.1	0.1	0.1	na	0.1	na	0.1	na	0.1	0.1	na	0.1	na	0.1	na	0.1	na	0.1	na	0.1	0.1	0.1	na	na	1.55897	0.110889	0.0260915	0.328318	0	0.254392	0.197861	0.0391372	0.808836	0.0543573	0.273961
176	Control	846.45	19664	19664	19664	1145.73	28.13	1825.28	99.14	407.29	1033.25	120.22	208.86	18.22	846.45	711.69	241.75	19664	191.89	51.33	87.96	280064	172.41	495.08	248.43	9714.33	40.21	83.49	501.16	8087.03	132.68	2157.08	128.29	1647.53	846.45	1226.65	28.13	21560.2	2.39857	0.12222	0.06111	0.0196425	0.0545625	0.0065475	0.128768	0.268448	0.958118	0.0196425	0.109125
177	Control	3.7	na	na	na	na	na	na	3.7	na	3.7	na	3.7	na	3.7	3.7	3.7	na	3.7	na	3.7	na	3.7	3.7	na	3.7	na	3.7	na	3.7	na	3.7	na	3.7	3.7	3.7	na	na	4.91935	0.237261	0.00870682	0	0.0413574	0	0.0979517	0.195903	1.83061	0.0413574	0.302562
178	Control	3.2	na	na	na	na	na	na	3.2	na	3.2	na	3.2	na	3.2	3.2	3.2	na	3.2	na	3.2	na	3.2	3.2	na	3.2	na	3.2	na	3.2	na	3.2	na	3.2	3.2	3.2	na	na	2.76368	0.306346	0.0218818	0.126915	0.0218818	0.166302	0.214442	0.485777	2.63457	0.115974	0.234136
179	Control	826.78	28.13	28.13	28.13	28.13	28.13	124.2	0.35	165.51	877.14	0.83	20.8	13.8	826.78	314.21	104.09	28.13	552.81	69.13	192.25	317555	74.5	339.54	28.13	1970.03	16.85	39.94	288.03	4977.73	86.96	5564.25	27.9	961.07	826.78	1866.64	796.28	18018.2	3.54276	0.21815	0.0109075	0	0.0632635	0	0.0632635	0.471204	1.7212	0.047993	0.647906
180	Control	2130.9	28.13	28.13	28.13	3033.43	28.13	2262.66	59.01	366.48	2883.31	74.24	148.8	40.79	2130.9	929.98	225.63	28.13	171.13	51.33	22.9	506773	589.46	535.52	341.81	8789.43	16.85	89.46	409.78	8818.73	96.55	1973.35	203.89	1358.52	2130.9	1679.13	990.46	36065.3	4.35971	0.382815	0.0175001	0	0	0.00218751	0.203439	0.903443	2.64252	0.0481253	0.107188
181	Control	0.1	na	na	na	na	na	na	0.1	na	0.1	na	0.1	na	0.1	0.1	0.1	na	0.1	na	0.1	na	0.1	0.1	na	0.1	na	0.1	na	0.1	na	0.1	na	0.1	0.1	0.1	na	na	2.57072	0.313072	0.712128	1.47056	0.0286615	0.158741	0.112441	0.943625	8.30081	0.0220473	0.202835
182	Control	734.74	111.82	111.82	111.82	1881.78	36.5	2224.85	59.98	424.35	1840.14	469.34	215.77	32	734.74	900.59	332.99	111.82	423.19	101.3	57.96	69501.2	6290.17	583.51	295.34	7333.5	41.29	88.75	377.97	4473.99	92.66	3517.12	106.09	401	734.74	865.43	1132.15	134780	2.63853	0.233517	0.010912	0	0	0	0.150586	0.809672	2.58615	0.0763842	0.183322
183	Control	2.6	na	na	na	na	na	na	2.6	na	2.6	na	2.6	na	2.6	2.6	2.6	na	2.6	na	2.6	na	2.6	2.6	na	2.6	na	2.6	na	2.6	na	2.6	na	2.6	2.6	2.6	na	na	4.78323	0.316698	0.017473	0.0829966	0.072076	0.0109206	0.386589	0.473954	2.59037	1.40002	0.233701
184	Control	1937.51	30.73	30.73	30.73	28.13	28.13	166.3	0.35	325.04	1033.25	2.41	20.8	13.8	1937.51	519.21	29.49	30.73	64.02	51.33	22.9	544743	74.5	584.25	131.82	1970.03	16.85	83.49	11.45	9931.45	56.07	592.95	64.69	3812.36	1937.51	1242.2	28.13	19598.1	2.77329	0.296982	1.76879	0.386514	0.0676945	0.0545923	0.238022	2.38896	0.862558	0.0655108	0.0742455
185	Control	632.15	70.1	70.1	70.1	1059.58	36.5	1489.74	38.33	320.48	2089.97	91.37	115.41	32	632.15	662.79	201.34	70.1	203.14	55.91	19.89	52708.4	96.2	382.44	326.32	2745.06	32.73	140.49	69.2	4136.61	44.91	416.52	60.13	538.91	632.15	519.51	475.2	7365.5	4.09553	0.2349	0.002175	0.002175	0	0	0.084825	0.10005	2.63393	0.106575	0.31755
186	Control	774.54	48.75	48.75	48.75	1924.82	36.5	2465.61	80.03	567.46	2275.48	459.02	197.06	32	774.54	942.94	393.3	48.75	82	263.45	113.19	62179.3	96.2	477.04	446.69	8093.6	17.42	47.24	574.93	6171.5	57.04	237.81	97.62	914.8	774.54	793.51	685.85	4715.35	1.62111	0.144781	0.00219366	0.445312	0	0.397052	0.168912	0.723906	1.01786	0.355372	0.0745843
187	Control	3.3	na	na	na	na	na	na	3.3	na	3.3	na	3.3	na	3.3	3.3	3.3	na	3.3	na	3.3	na	3.3	3.3	na	3.3	na	3.3	na	3.3	na	3.3	na	3.3	3.3	3.3	na	na	1.78571	0.0457875	0.0523286	0.054509	0.00218036	0.085034	0.0174429	0.130822	0.527647	0.0130822	0.0327054
188	Control	1341.12	28.13	28.13	28.13	28.13	28.13	166.3	3.48	13.14	1296.19	3.29	20.8	13.8	1341.12	245.77	16.07	28.13	103.41	11.6	22.9	412198	74.5	262.62	28.13	5462.89	3.5	72.69	11.45	12481.6	10.64	1322.92	48.57	1916.48	1341.12	1568.8	1385.85	17466.8	1.36416	1.13971	0.00435834	0.0348667	0	0.0544793	0.076271	0.176513	1.0569	0.0392251	2.17481
189	Control	0.1	na	na	na	na	na	na	0.1	na	0.1	na	0.1	na	0.1	0.1	0.1	na	0.1	na	0.1	na	0.1	0.1	na	0.1	na	0.1	na	0.1	na	0.1	na	0.1	0.1	0.1	na	na	2.86973	0.64329	0.037071	0.030529	0.0545161	0.0152645	0.257316	0.427406	2.50992	0.0174452	0.990013
[truncated: 15 more columns]
