# Supplementary material for: Gut microbiome-immune interactions and their role in rheumatoid arthritis development
Source: PeerJ journal article supplement (doi:10.7717/peerj.17477), 2024-07-11
Supplement: RAW_DATA_FOR_TABLE1.xlsx [file RAW_DATA_FOR_TABLE1.xlsx]

## Sheet: Лист1
ID	group	Age	RF_status	ACPA_status	DAS28_score	Disease_activity	Xray_stage	RA_duration_in_years	Age_of_RA_onset	Leukocytes_10⌃9_l	ESR_mm_hour	CRP_mg_L	Gamma_globuline_%	RF_U_ml	ACPA_IU_ml	Heredity for RA	Smoking
РА001	case	52	RF+	ACPA-	5.05	2	2	6	46	8	25	23.5	21.9	162.7	11.6	No	No
РА002	case	40	RF+	ACPA+	3.82	2	3	10	30	3.5	4	0.4	17.8	41.4	35.5	Yes	No
РА003	case	50	RF+	ACPA-	4.95	2	3	10	40	3.8	4	2.1	20.5	20	0.5	Yes	No
РА004	case	69	RF+	ACPA-	6.28	3	1	1.5	34	3.7	51	2.1	27.2	91.9	0.5	No	No
РА005	case	30	RF+	ACPA+	4.55	2	1	1	29	4.9	46	4.6	23.3	266.4	138.7	No	Yes
РА006	case	36	RF+	ACPA+	7.38	3	3	12	25	9.9	52	43.3	22.8	100.9	121.6	No	No
РА007	case	39	RF+	ACPA+	4.11	2	2	2	37	3.5	24	0.7	23	83.8	125.7	No	No
РА008	case	38	RF-	ACPA-	5.87	3	2	13	25	4.6	28	2.8	19.7	6.3	0.9	No	No
РА009	case	53	RF+	ACPA+	6.37	3	3	16	36	4.8	85	7.7	23.5	257.7	88.6	No	No
РА010	case	49	RF+	ACPA+	5.64	3	4	23	25	7	10	7.9	18.6	86.3	18.3	Yes	No
РА011	case	42	RF-	ACPA-	5.09	2	1	4	40	5.1	23	0.2	21.2	6.3	0.5	No	No
РА012	case	51	RF+	ACPA+	6.6	3	2	3	48	6.5	14	2.6	18.3	43.4	1055	Yes	No
РА013	case	47	RF+	ACPA+	4.73	2	3	8	38	6	14	6.9	20.3	34.3	75.7	No	No
РА014	case	31	RF+	ACPA-	2.87	1	2	1	29	5	11	3	21.3	22.4	1.6	No	No
РА015	case	50	RF-	ACPA-	6.61	3	2	5	45	4	55	0.7	19.2	7.9	0.8	No	No
РА016	case	44	RF+	ACPA+	7.2	3	3	8	35	6.8	80	43.6	28.1	260.9	654.2	No	No
РА017	case	34	RF-	ACPA-	3.39	2	2	3	31	4.5	14	0.3	19.4	4.6	0.5	Yes	No
РА018	case	48	RF+	ACPA-	4.99	2	3	6	42	4.8	20	37.8	26.4	45.2	0.5	No	No
РА019	case	51	RF+	ACPA+	4.25	2	2	2	50	8.1	20	7.4	19.5	14.4	73.4	Yes	No
РА020	case	48	RF+	ACPA+	6.28	3	4	24	25	4.8	30	7.6	19.3	184.2	751.2	Yes	No
РА021	case	38	RF+	ACPA+	5.29	3	3	17	21	8.2	74	54.4	21	115.1	273.4	Yes	No
РА022	case	34	RF+	ACPA+	2.24	0	2	3	31	3.6	20	0.8	22.4	121.7	497.4	No	No
РА023	case	31	RF+	ACPA-	6.22	3	3	4	28	6.9	54	7.5	24.2	55	15.3	No	No
РА024	case	47	RF+	ACPA+	4.32	2	2	9	39	5.2	24	9	24.6	65	1173.6	No	No
РА025	case	55	RF+	ACPA+	5.1	2	3	14	26	6.8	8	2.2	12	35.4	236	No	No
РА026	case	46	RF+	ACPA+	5.48	3	2	3	43	5.7	38	2.6	22	20.6	53.7	No	No
РА027	case	43	RF+	ACPA-	4.52	2	2	5	38	6.5	23	5.5	17.3	161.9	0.5	No	No
РА028	case	50	RF+	ACPA-	3.29	2	2	6	44	4.6	17	0.5	20.5	101.8	0.5	Yes	No
РА029	case	44	RF+	ACPA+	1.9	0	1	6	38	6.5	15	0.7	18.9	231.8	179	No	No
РА030	case	53	RF-	ACPA+	3.96	2	2	7	46	6.8	13	1.6	18.6	13.6	53.5	Yes	No
РА031	case	38	RF-	ACPA-	4.51	2	2	6	32	5	5	0.3	14	6.7	0.5	Yes	No
РА032	case	42	RF+	ACPA+	8.35	3	4	12	30	7.6	53	16.2	15.7	257.4	116.9	No	No
РА033	case	48	RF+	ACPA-	7.15	3	2	2	47	2.5	38.3	6.7	38.4	33.3	0.7	No	No
РА034	case	41	RF+	ACPA+	7.15	3	4	16	25	12.7	19	17.2	18.7	39.4	311.8	No	No
РА035	case	52	RF-	ACPA-	3.93	2	1	6	46	5.8	25	4.5	18.5	8.3	0.5	No	No
РА036	case	44	RF-	ACPA-	1.54	0	1	10	34	4.2	9	0.7	17.6	7.7	0.5	Yes	No
РА037	case	35	RF+	ACPA-	3.77	2	2	11	24	7.8	36	4	16.4	63.2	1.8	No	No
РА038	case	30	RF+	ACPA-	4.56	2	1	5	25	5.2	17	2.9	17.7	15.8	2.3	No	No
РА039	case	38	RF+	ACPA-	4.97	2	2	4	35	3.4	16	1.3	15.2	61.7	13.2	Yes	No
РА040	case	47	RF-	ACPA-	6.13	3	1	8	40	3.1	11	0	19.3	7	0.5	No	No
РА041	case	47	RF-	ACPA+	5.82	3	2	2	46	8.2	63	16.4	27.6	9.5	22.6	No	No
РА042	case	48	RF+	ACPA-	4.05	2	3	23	25	6.3	10	6.6	20.6	125	1.7	Yes	No
РА043	case	49	RF+	ACPA-	6.82	3	2	4	46	6.1	49	0.5	30.4	21	0.5	No	No
РА044	case	31	RF+	ACPA+	3.16	1	1	11	21	5.9	16	1.5	17.6	29.2	587.9	Yes	Yes
РА045	case	30	RF+	ACPA+	4.74	2	2	1	29	11.5	37	5.1	18.4	126.8	652	No	No
РА046	case	47	RF-	ACPA-	2.77	1	2	5	42	4.1	4	0	17	7.6	0.5	No	No
РА047	case	32	RF+	ACPA+	3.08	1	2	6	26	8.1	20	4.2	13.2	52.1	264	No	No
РА048	case	57	RF+	ACPA+	6.27	3	3	35	25	6.5	32	8.2	16.7	171.9	260.6	Yes	No
РА049	case	31	RF+	ACPA-	4.19	2	2	5	26	4.9	17	0.9	16	65.1	6.2	No	No
РА050	case	55	RF+	ACPA-	5.43	3	4	29	25	8.2	42	7.4	17.5	217.8	10.8	No	No
РА051	case	47	RF-	ACPA+	3.11	1	2	2	44	10	14	6.3	15.5	10.8	129.4	No	No
РА052	case	54	RF+	ACPA+	5.54	3	4	14	40	4.8	120	51.1	20.4	84.5	123.9	No	No
РА053	case	54	RF+	ACPA-	8	3	1	1	53	2.9	45	0.3	23.8	122.1	0.5	No	No
РА054	case	48	RF+	ACPA+	7.33	3	3	2	46	9.4	58	44.7	20.8	293.4	100.4	Yes	Yes
РА055	case	49	RF+	ACPA+	3.36	2	4	21	29	3.6	20	3.2	22.3	86.9	4727	Yes	No
РА056	case	52	RF-	ACPA-	4.05	2	1	15	37	9	17	1.5	18.5	7	0.5	Yes	No
РА057	case	49	RF-	ACPA-	4.96	2	2	24	25	7.9	10	15.7	18.6	8.8	0.5	No	No
РА059	case	55	RF+	ACPA+	5.5	3	2	4	51	8.8	48	13.5	18.9	108.8	248.7	No	No
РА060	case	43	RF+	ACPA+	4.38	2	4	16	27	11.7	20	2.5	16.2	204.9	89.6	Yes	No
РА061	case	52	RF+	ACPA+	6.72	3	4	27	26	5.3	47	21.6	18.6	64.6	33.4	Yes	No
РА062	case	46	RF+	ACPA+	4.59	2	4	22	24	5.3	17	6.6	15.2	73.6	98.7	Yes	No
РА063	case	38	RF+	ACPA-	3.72	2	2	5	33	6.8	18	0.2	15.8	162.5	3.4	No	No
РА064	case	42	RF-	ACPA-	3.16	1	1	1	41	5.5	24	5	19.7	8.9	0.5	Yes	No
РА065	case	43	RF+	ACPA+	4.26	2	3	12	31	4.6	9	0.4	14.9	18.4	190.7	No	No
РА066	case	37	RF-	ACPA-	6.15	3	3	22	15	11.4	46	70.3	25.4	10.1	0.5	Yes	No
РА067	case	47	RF-	ACPA-	4.75	2	2	2	45	5.6	32	1.2	16.8	9.3	0.5	No	No
РА068	case	33	RF+	ACPA+	3.72	2	3	9	24	7.8	15	1.7	12.8	68.9	265.9	No	No
РА069	case	44	RF+	ACPA+	2.39	0	2	25	19	6.1	8	2.6	15	77.2	241	No	No
РА070	case	53	RF+	ACPA+	3.9	2	2	3	50	4.5	57	0.7	25.2	23.6	60.7	No	No
РА073	case	42	RF+	ACPA+	2.82	1	1	3	39	5	28	6.1	22.1	69.8	34.8	No	No
РА074	case	45	RF+	ACPA-	3.85	2	3	12	33	6.4	15	1.1	20.5	21.5	4.4	No	No
РА075	case	39	RF+	ACPA+	4.39	2	4	10	29	7.9	47	7.4	19.5	18.5	163.3	No	No
РА076	case	29	RF+	ACPA-	1.61	0	1	2	27	7.3	3	1.6	15.3	22.8	4.3	No	Yes
РА077	case	54	RF+	ACPA-	4.23	2	2	2	52	6.1	4	0.3	17.8	67.8	0.5	No	No
РА079	case	35	RF+	ACPA+	5.36	3	3	14	21	6.3	28	14.3	20.3	46.4	1600	Yes	No
РА080	case	36	RF+	ACPA+	2.4	0	1	5	34	7.8	13	0	18	15.6	93.1	Yes	No
РА082	case	35	RF+	ACPA+	1.74	0	1	1	33	6.5	12	0.6	20.9	45.7	46.3	Yes	No
РА001С	control	41	NA	NA	NA	NA	NA	NA	NA	4.7	18	0.8	20	8.6	0	No	No
РА002С	control	40	NA	NA	NA	NA	NA	NA	NA	5.9	11	1.3	16.2	9	0	No	No
РА003С	control	39	NA	NA	NA	NA	NA	NA	NA	5.9	14	7.1	15.6	7.2	0	No	No
РА004С	control	37	NA	NA	NA	NA	NA	NA	NA	7.7	21	0.7	20.7	7.1	0	No	No
РА005С	control	48	NA	NA	NA	NA	NA	NA	NA	5.3	5	0.5	17.2	8.4	0	No	No
РА006С	control	36	NA	NA	NA	NA	NA	NA	NA	4.3	14	2	16.3	9.3	0	No	No
РА007С	control	47	NA	NA	NA	NA	NA	NA	NA	8.3	10	0.4	18.6	6.6	0	No	No
РА008С	control	55	NA	NA	NA	NA	NA	NA	NA	3.7	6	0.5	20.5	6.7	0	No	No
РА009С	control	47	NA	NA	NA	NA	NA	NA	NA	5.7	13	0.4	18.3	6.7	0	No	No
РА010С	control	37	NA	NA	NA	NA	NA	NA	NA	4.6	2	0.1	19.4	9.6	0	No	Yes
РА011С	control	31	NA	NA	NA	NA	NA	NA	NA	5.1	22	1.7	18.8	7.7	0	No	No
РА012С	control	34	NA	NA	NA	NA	NA	NA	NA	5.9	9	0.5	17.5	8.4	0	No	No
РА013С	control	38	NA	NA	NA	NA	NA	NA	NA	4.6	8	0.2	18.3	13.8	0	No	No
РА014С	control	50	NA	NA	NA	NA	NA	NA	NA	5.3	31	8	19.1	6.8	0	No	No
РА015С	control	42	NA	NA	NA	NA	NA	NA	NA	5.3	17	2.3	18.9	12	0	No	No
РА016С	control	35	NA	NA	NA	NA	NA	NA	NA	4.4	25	0.4	21.2	7.9	0	No	Yes
РА017С	control	43	NA	NA	NA	NA	NA	NA	NA	3.3	10	1.1	16.9	6.7	0	No	No
РА018С	control	53	NA	NA	NA	NA	NA	NA	NA	4.6	15	5.4	14	9	0	No	No
РА019С	control	50	NA	NA	NA	NA	NA	NA	NA	3.8	14	15.7	19	9.9	0	No	No
РА020С	control	53	NA	NA	NA	NA	NA	NA	NA	5.8	26	0.7	12.9	7.5	1.4	No	No
РА021С	control	49	NA	NA	NA	NA	NA	NA	NA	4.4	18	0.4	22.2	11.7	0	No	No
РА022С	control	52	NA	NA	NA	NA	NA	NA	NA	4.9	30	9	23.6	7.5	4.2	No	No
РА023С	control	54	NA	NA	NA	NA	NA	NA	NA	3.5	10	1.7	16.2	6.9	0	No	No
РА025С	control	37	NA	NA	NA	NA	NA	NA	NA	7.5	11	1	19.4	8.3	0	No	No
РА026С	control	47	NA	NA	NA	NA	NA	NA	NA	3.2	61	2.7	28.3	109	0	No	No
РА027С	control	51	NA	NA	NA	NA	NA	NA	NA	5	33	1.1	21.4	8.1	0	No	No
РА028С	control	35	NA	NA	NA	NA	NA	NA	NA	4.1	3	0.5	13.7	7	0	No	No
РА029С	control	35	NA	NA	NA	NA	NA	NA	NA	2.9	6	0.7	19.8	9.1	0	No	No
РА030С	control	34	NA	NA	NA	NA	NA	NA	NA	4.3	9	1.7	16.9	7.6	0	No	No
РА032С	control	42	NA	NA	NA	NA	NA	NA	NA	4.5	4	1.5	14.9	4.5	0.5	No	No
РА033С	control	39	NA	NA	NA	NA	NA	NA	NA	6	18	0.5	18.4	9.3	0.5	No	Yes
РА034С	control	31	NA	NA	NA	NA	NA	NA	NA	4	17	1.7	16.9	7.6	0.5	No	No
РА035С	control	30	NA	NA	NA	NA	NA	NA	NA	4.6	2	0.3	15.4	7.8	0.6	No	No
РА036С	control	38	NA	NA	NA	NA	NA	NA	NA	3.9	7	0.7	21.5	7.5	0.5	No	No
РА037С	control	31	NA	NA	NA	NA	NA	NA	NA	4.7	6	0.3	22.7	8.6	0.7	No	No
РА038С	control	42	NA	NA	NA	NA	NA	NA	NA	4.7	7	1.3	15.4	5.1	0.5	No	No
РА039С	control	53	NA	NA	NA	NA	NA	NA	NA	5.9	17	3.2	21.8	10	0.5	No	No
РА040С	control	43	NA	NA	NA	NA	NA	NA	NA	7.4	19	12	15.1	8.4	0.5	No	No
РА041С	control	36	NA	NA	NA	NA	NA	NA	NA	8.3	10	6.1	17.3	7.9	2.4	No	No
РА042С	control	39	NA	NA	NA	NA	NA	NA	NA	6.5	9	0.3	16.9	6.6	0.5	No	No
РА043С	control	38	NA	NA	NA	NA	NA	NA	NA	4.3	4	2.2	15.4	6.6	0	No	No
РА044С	control	37	NA	NA	NA	NA	NA	NA	NA	4.7	21	0.8	21.6	6.7	0	No	No
РА045С	control	39	NA	NA	NA	NA	NA	NA	NA	4.3	12	0	16.8	6.4	0	No	No
РА046С	control	42	NA	NA	NA	NA	NA	NA	NA	5.8	16	2.4	14.1	9.2	0	No	No
РА047С	control	37	NA	NA	NA	NA	NA	NA	NA	5	43	1.2	21.2	7.1	9.2	No	Yes
РА050С	control	38	NA	NA	NA	NA	NA	NA	NA	4.7	3	0.8	14.9	5.1	0	No	No
РА051С	control	40	NA	NA	NA	NA	NA	NA	NA	6.5	8	0.1	20.4	9.8	0.5	No	No
РА052С	control	43	NA	NA	NA	NA	NA	NA	NA	3.9	13	1.9	14.2	6.6	0.3	No	No
РА053С	control	37	NA	NA	NA	NA	NA	NA	NA	4.9	2	1.6	15.6	10.5	0.5	No	No
РА054С	control	44	NA	NA	NA	NA	NA	NA	NA	5	3	0.4	14.8	14.6	0	No	No
РА055С	control	34	NA	NA	NA	NA	NA	NA	NA	6.3	2	0.3	18	5.1	0.5	No	No
РА056С	control	41	NA	NA	NA	NA	NA	NA	NA	3.3	14	0.4	22.5	6.6	0.8	No	No
РА057С	control	40	NA	NA	NA	NA	NA	NA	NA	6.1	12	0.6	16.9	6.1	0	No	No
РА058С	control	40	NA	NA	NA	NA	NA	NA	NA	5.2	3	0.4	16.2	6.4	0	No	No
РА059С	control	32	NA	NA	NA	NA	NA	NA	NA	5.2	18	0.2	20.7	4.5	0	No	No
РА060С	control	55	NA	NA	NA	NA	NA	NA	NA	5.8	26	2.5	18.9	6.7	0	No	No
РА061С	control	35	NA	NA	NA	NA	NA	NA	NA	6	4	1.3	18	8.7	0.5	No	No
РА062С	control	45	NA	NA	NA	NA	NA	NA	NA	5	19	2.4	19.1	8	0	No	No
РА064С	control	52	NA	NA	NA	NA	NA	NA	NA	10.7	24	6.6	13.5	7.2	0	No	No
РА065С	control	36	NA	NA	NA	NA	NA	NA	NA	5.6	7	0.1	20.7	6.3	0.1	No	Yes
РА066С	control	44	NA	NA	NA	NA	NA	NA	NA	6.2	3	0.5	17.9	7.4	0.1	No	No
РА067С	control	41	NA	NA	NA	NA	NA	NA	NA	6.1	5	2.4	17.8	6.3	1.3	No	No
РА068С	control	42	NA	NA	NA	NA	NA	NA	NA	3.9	40	0.6	23.3	10.4	0.1	No	No
РА069С	control	53	NA	NA	NA	NA	NA	NA	NA	6.9	4	0.5	17.6	6.1	0.1	No	No
РА070С	control	42	NA	NA	NA	NA	NA	NA	NA	3.6	2	0.4	17.4	6.4	0.1	No	No
РА072С	control	50	NA	NA	NA	NA	NA	NA	NA	3.7	5	0.6	12.3	8.6	1.7	No	No
РА073С	control	55	NA	NA	NA	NA	NA	NA	NA	5.7	10	5.1	13.3	6.4	0.1	No	No
РА074С	control	41	NA	NA	NA	NA	NA	NA	NA	5.8	19	0.6	18	8.8	0.4	No	No
РА075С	control	51	NA	NA	NA	NA	NA	NA	NA	5.3	11	3.8	18.2	4.1	0.1	No	No
РА076С	control	36	NA	NA	NA	NA	NA	NA	NA	5.9	4	0.5	13.2	6.6	0.2	No	No
РА077С	control	34	NA	NA	NA	NA	NA	NA	NA	5.3	30	0.3	20.8	8.4	0.2	No	No
РА078С	control	36	NA	NA	NA	NA	NA	NA	NA	4.1	10	1.1	16.9	8.4	0.2	No	Yes
РА079С	control	54	NA	NA	NA	NA	NA	NA	NA	9.3	8	2.4	18.7	7.7	0.1	No	No
РА080С	control	39	NA	NA	NA	NA	NA	NA	NA	2.9	26	7.6	15.7	8.1	0.1	No	No
РА081С	control	41	NA	NA	NA	NA	NA	NA	NA	4.5	4	1.2	15.2	5.7	0.1	No	No
РА082С	control	39	NA	NA	NA	NA	NA	NA	NA	2.9	5	0.5	13.2	6.6	0.2	No	Yes
РА083С	control	53	NA	NA	NA	NA	NA	NA	NA	6.3	15	1.5	14.5	8.4	0.1	No	No
РА084С	control	45	NA	NA	NA	NA	NA	NA	NA	3.8	4	0	19.7	7.2	0.5	No	No
РА085С	control	35	NA	NA	NA	NA	NA	NA	NA	5.7	8	7.6	15.7	8.1	0.1	No	No
РА086С	control	48	NA	NA	NA	NA	NA	NA	NA	4.5	8	1.3	16.1	9.2	0.1	No	No
РА087С	control	43	NA	NA	NA	NA	NA	NA	NA	8.4	10	4	20.8	4.9	0.6	No	No
РА088С	control	35	NA	NA	NA	NA	NA	NA	NA	8.1	50	6.5	15	9	1.2	No	No
РА089С	control	40	NA	NA	NA	NA	NA	NA	NA	4.3	3	0.5	17.5	6.3	0.1	No	No
РА090С	control	42	NA	NA	NA	NA	NA	NA	NA	5.3	15	1.8	15.7	6.8	0.1	No	No
РА091С	control	43	NA	NA	NA	NA	NA	NA	NA	5.7	27	5.4	19.9	6.7	0.1	No	No
РА092С	control	39	NA	NA	NA	NA	NA	NA	NA	5.4	14	1.3	15.9	6.6	0.1	No	No
РА093С	control	33	NA	NA	NA	NA	NA	NA	NA	6.2	8	0.5	13.6	5.6	0.1	No	No
РА094С	control	55	NA	NA	NA	NA	NA	NA	NA	5	30	3.1	17.2	7.4	1.1	No	No
РА095С	control	34	NA	NA	NA	NA	NA	NA	NA	4.3	4	0.4	17.6	6.1	0.5	No	No
РА096С	control	49	NA	NA	NA	NA	NA	NA	NA	4.5	30	1.6	14.4	5.5	0.5	No	No
РА097С	control	51	NA	NA	NA	NA	NA	NA	NA	4.2	23	0	19.1	5.9	0.5	No	No
РА098С	control	42	NA	NA	NA	NA	NA	NA	NA	7.3	9	0.2	20.3	72	0.1	No	No
РА099С	control	45	NA	NA	NA	NA	NA	NA	NA	5	9	0.9	21	44.2	0.2	No	No
РА100С	control	48	NA	NA	NA	NA	NA	NA	NA	4.5	19	1.3	15.9	7.8	0.2	No	No
РА101С	control	50	NA	NA	NA	NA	NA	NA	NA	5.4	23	1.6	16.7	9.2	0.1	No	No
РА102С	control	44	NA	NA	NA	NA	NA	NA	NA	4.5	15	0.1	16.9	19	0.2	No	No
РА103С	control	40	NA	NA	NA	NA	NA	NA	NA	5.6	20	0.6	20.8	6	0.6	No	No
РА105С	control	35	NA	NA	NA	NA	NA	NA	NA	5	3	0.1	17	4.7	0.3	No	No
РА106С	control	41	NA	NA	NA	NA	NA	NA	NA	6.4	8	1.4	18	19.5	0.1	No	No
РА107С	control	46	NA	NA	NA	NA	NA	NA	NA	5.1	5	1	13.3	7	0.1	No	No
РА108С	control	42	NA	NA	NA	NA	NA	NA	NA	5.8	19	3.6	20.4	7.8	0.2	No	No
РА109С	control	34	NA	NA	NA	NA	NA	NA	NA	5.3	8	0.6	18.5	6	0.3	No	No
РА110С	control	48	NA	NA	NA	NA	NA	NA	NA	4.9	11	1.9	24.4	25.1	0.7	No	No
РА111С	control	55	NA	NA	NA	NA	NA	NA	NA	3.9	10	0	15.6	9.8	0.7	No	No
РА112С	control	51	NA	NA	NA	NA	NA	NA	NA	4.6	4	0.7	18.4	7.9	1.4	No	No
РА113С	control	54	NA	NA	NA	NA	NA	NA	NA	3.9	6	0	18.4	4.9	0.3	No	No
РА114С	control	39	NA	NA	NA	NA	NA	NA	NA	9	27	3	21.2	6.7	0.9	No	No
РА115С	control	34	NA	NA	NA	NA	NA	NA	NA	10.7	12	0.7	21.3	6.8	0.8	No	No
РА116С	control	44	NA	NA	NA	NA	NA	NA	NA	4.9	15	0.2	17.7	6.4	0.8	No	No
РА117С	control	36	NA	NA	NA	NA	NA	NA	NA	5.4	3	1.1	16.7	16.4	0.3	No	No
РА118С	control	43	NA	NA	NA	NA	NA	NA	NA	6.5	30	2.2	18.3	1.6	5.7	No	No
РА119С	control	45	NA	NA	NA	NA	NA	NA	NA	7.4	29	2.1	23.5	7	0.3	No	No
РА120С	control	41	NA	NA	NA	NA	NA	NA	NA	4.9	13	0.5	17.6	6.7	0.3	No	No

## Sheet: Sheet1
sCD40L
Eotaxin
FGF2
FLT3L
Fractalkine
GCSF
GROa
IFNa2
IFNy	pro-inflammatory
IL1a	pro-inflammatory
IL1b	pro-inflammatory
IL1RA	anti-inflammatory
IL2
IL4	anti-inflammatory
IL5
IL6	pro-inflammatory
IL8	pro-inflammatory
IL9
IL10	anti-inflammatory
IL12 _p70
IL13	anti-inflammatory
IL15
IL17A
IL17E_IL25
IL7F
IL18	pro-inflammatory
IL22	anti-inflammatory
IP10
MCSF
MIG
MIP1a
PDGF_AA
PDGF_AB_BB
RANTES
TGFa
TNFa	pro-inflammatory
TNFb	anti-inflammatory
VEGF_A
IgA
IgG1
IgG2
IgG3
IgG4
IgM
