# Supplementary figures and images for: Gut microbiome-immune interactions and their role in rheumatoid arthritis development
Source: PeerJ journal article supplement (doi:10.7717/peerj.17477), 2024-07-11

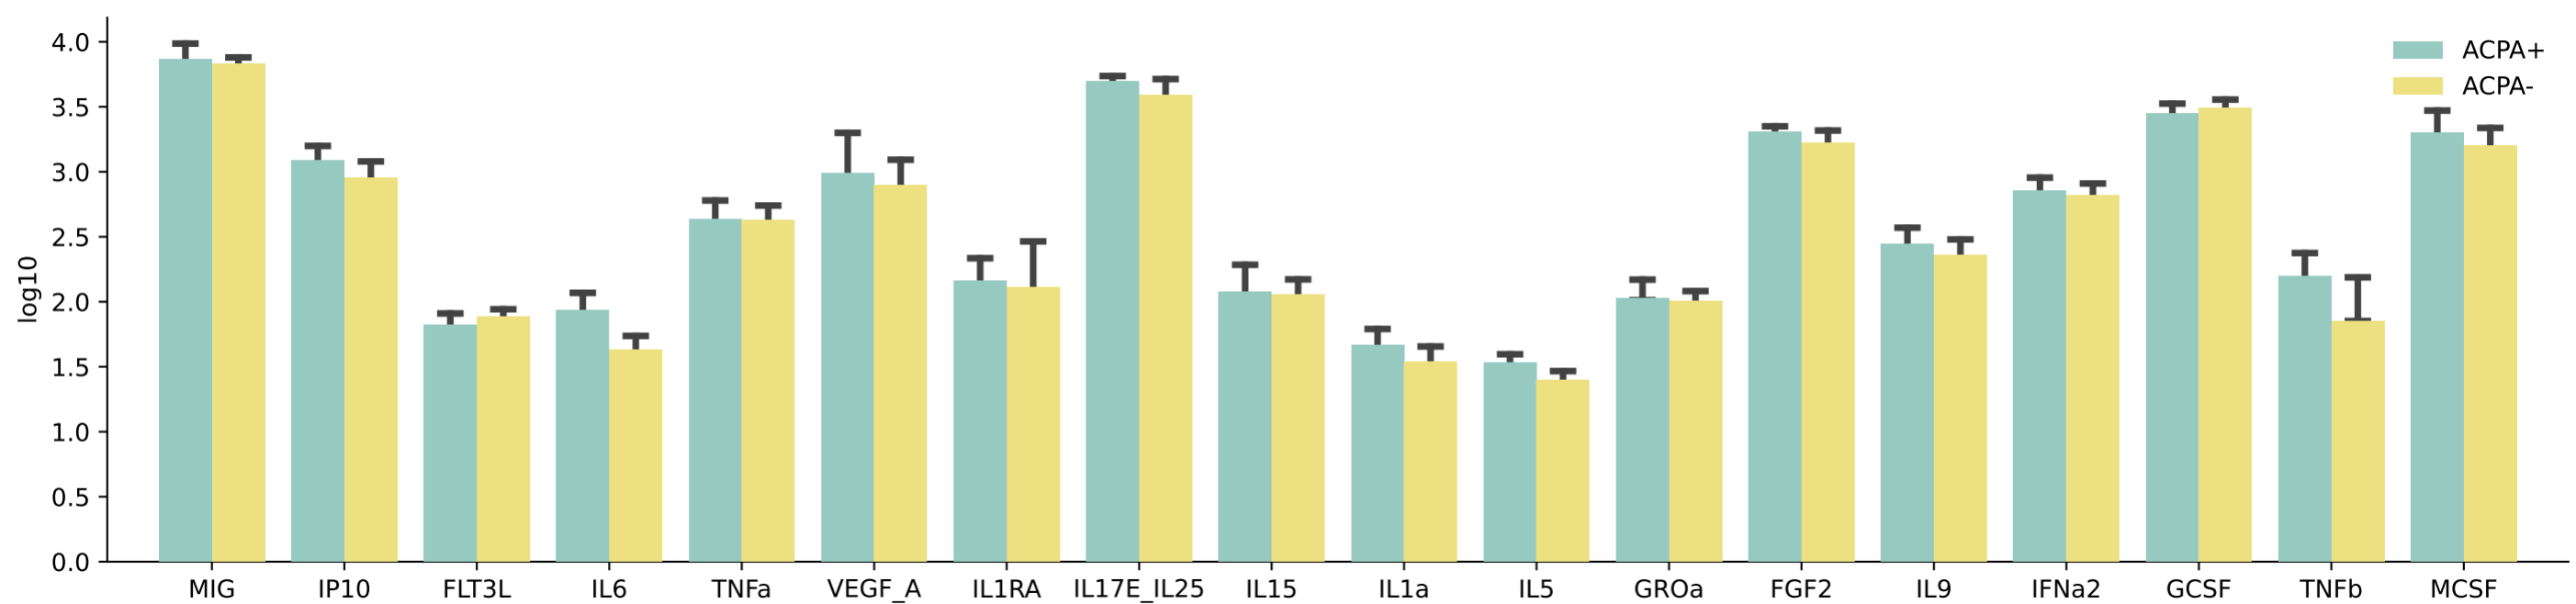

Supplement: FigureS2.pdf [file FigureS2.pdf]

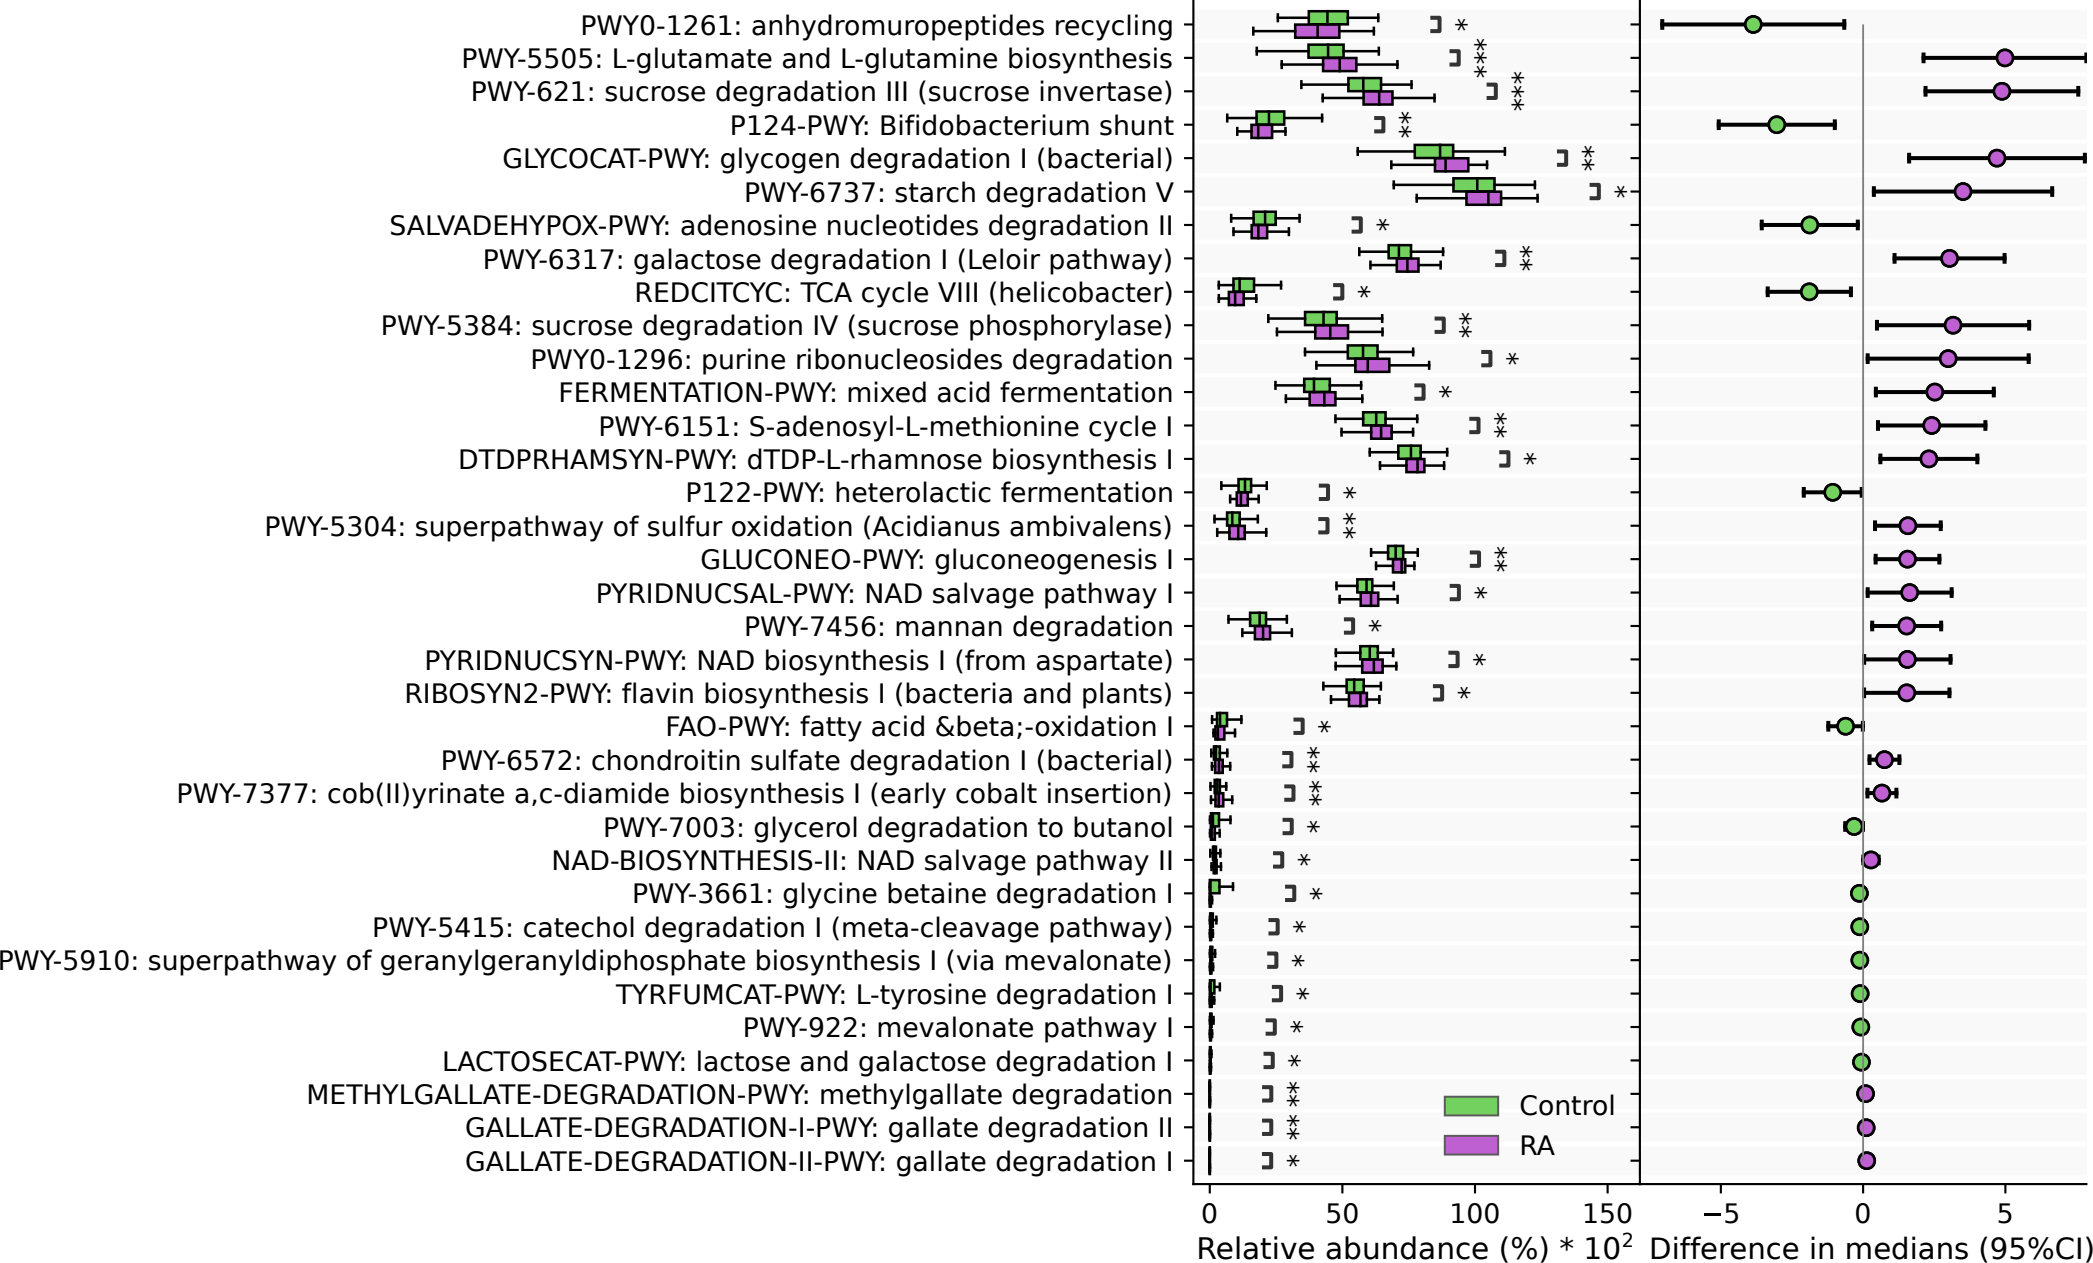

Supplement: FigureS5.pdf [file FigureS5.pdf]

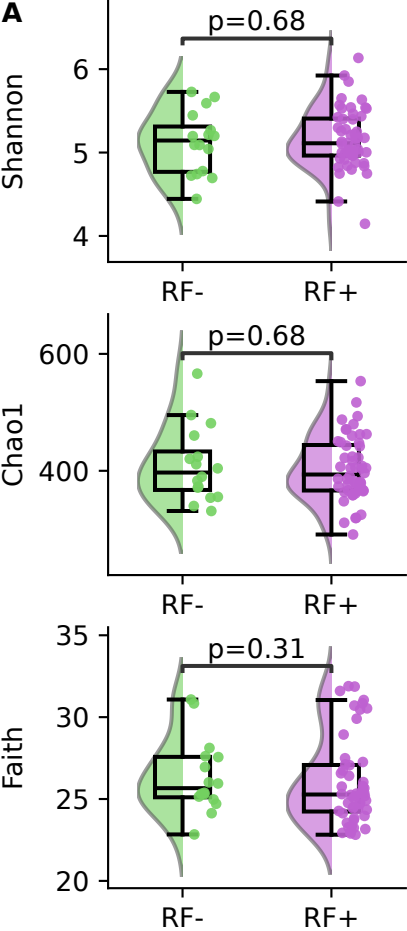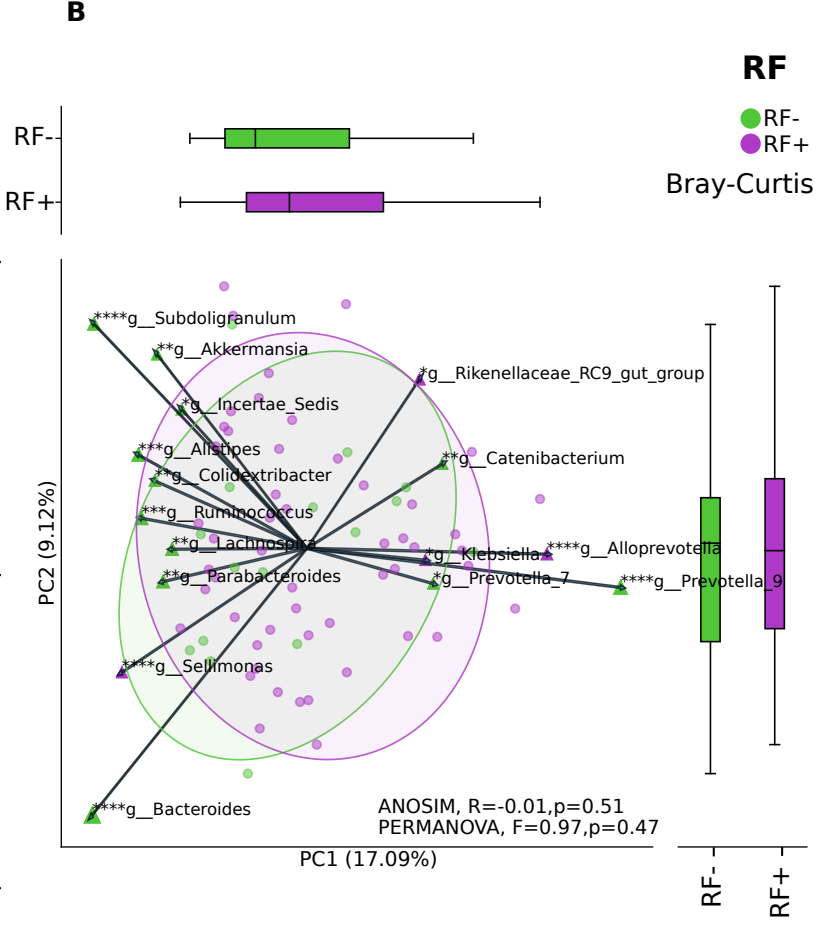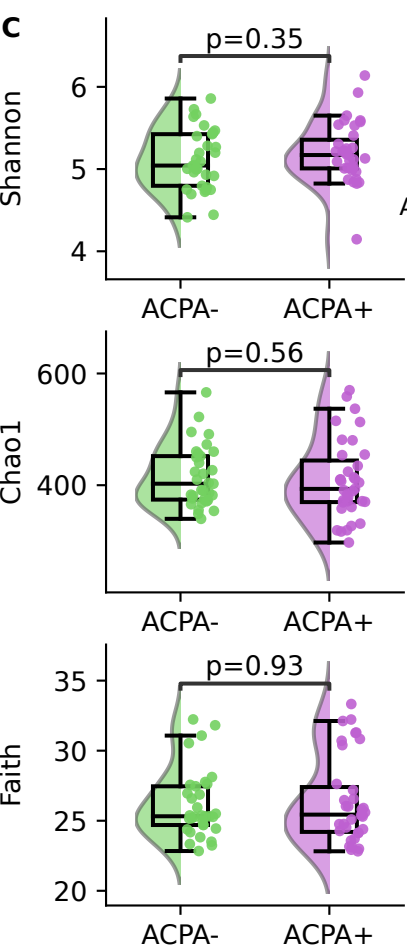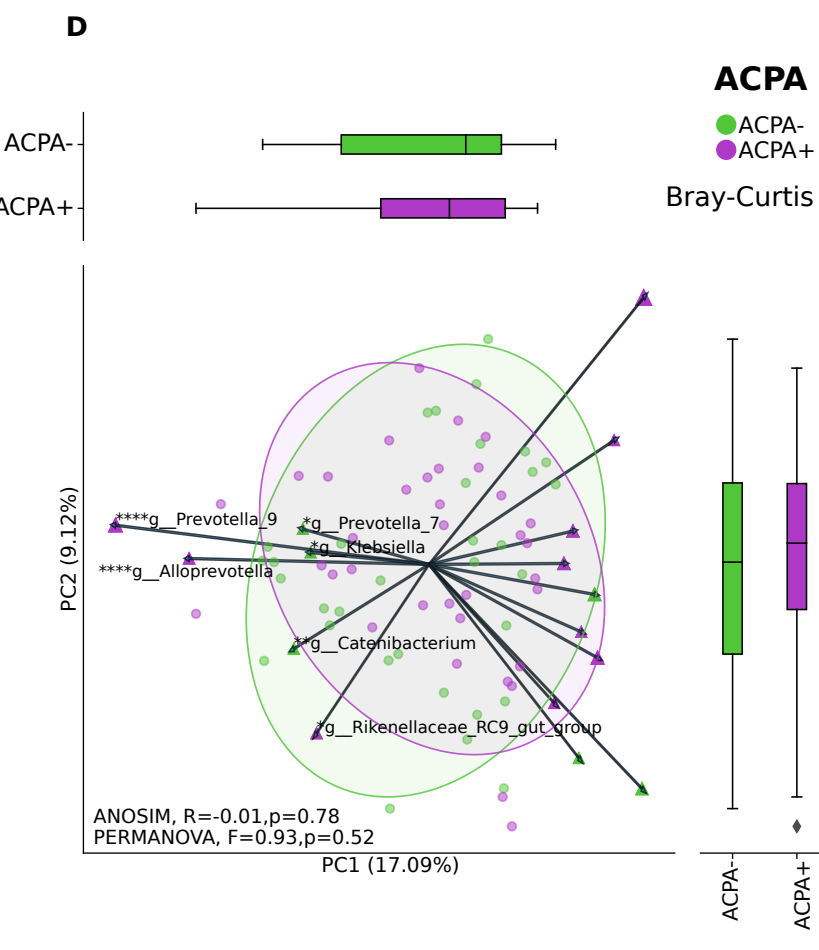

Supplement: figureS1.pdf [file figureS1.pdf]
